# Supplementary material for: CD44 Gene rs8193 C Allele Is Significantly Enriched in Gastric Cancer Patients
Source: PubMed Central journal article supplement (PMC6722445; doi:10.22074/cellj.2020.6389), 2019-07-31
Supplement: Cell-J-21-451-s01.pdf [file Cell-J-21-451-s01.pdf]

## Supplementary Information for

# **CD44 Gene rs8193 C Allele Is Significantly Enriched in Gastric Cancer Patients**

Roya Mokhtarian, M.Sc.<sup>1</sup>, Hossein Tabatabaeian, Ph.D.<sup>2,3</sup>, Pardis Saadatmand, M.Sc.<sup>4</sup>, Mansoureh Azadeh, M.Sc.<sup>4</sup>,  
Negar Balmeh, M.Sc.<sup>1</sup>, Bagher Yakhchali, Ph.D.<sup>5</sup>, Kamran Ghaedi, Ph.D.<sup>3,6\*</sup>

1. Division of Cellular and Molecular Biology, Department of Biology, NourDanesh Institute of Higher Education, Meymeh, Iran
2. Department of Biochemistry, Yong Loo Lin School of Medicine, National University of Singapore, City????, Singapore
3. Department of Cellular Biotechnology, Cell Science Research Center, Royan Institute for Biotechnology, ACECR, Isfahan, Iran
4. ZistFanavari Novin Biotechnology Institute, Isfahan, Iran
5. Institute of Industrial and Environmental Biotechnology, National Institute of Genetic Engineering and Biotechnology Institute, Tehran, Iran
6. Department of Biology, Faculty of Sciences, University of Isfahan, Isfahan, Iran

*\*Corresponding Address: P.O.Box: 816513-1378, Department of Cellular Biotechnology, Cell Science Research Center, Royan Institute for Biotechnology, ACECR, Isfahan, Iran  
Email: kamranghaedi@royaninstitute.org*

Table S1: miR-570 targetome

| miRNA      | Gene             | miRWalk | Microt4 | miRanda | miRMap | RNA22 | RNAhybrid | Targetscan | SUM |
|------------|------------------|---------|---------|---------|--------|-------|-----------|------------|-----|
| miR-570-3p | <i>ACVR2A</i>    | 1       | 1       | 1       | 1      | 1     | 1         | 1          | 7   |
| miR-570-3p | <i>ADCYAP1R1</i> | 1       | 1       | 1       | 1      | 1     | 1         | 1          | 7   |
| miR-570-3p | <i>ZFHX3</i>     | 1       | 1       | 1       | 1      | 1     | 1         | 1          | 7   |
| miR-570-3p | <i>ATRX</i>      | 1       | 1       | 1       | 1      | 1     | 1         | 1          | 7   |
| miR-570-3p | <i>ATRX</i>      | 1       | 1       | 1       | 1      | 1     | 1         | 1          | 7   |
| miR-570-3p | <i>CAMK2A</i>    | 1       | 1       | 1       | 1      | 1     | 1         | 1          | 7   |
| miR-570-3p | <i>CDK6</i>      | 1       | 1       | 1       | 1      | 1     | 1         | 1          | 7   |
| miR-570-3p | <i>CEBPG</i>     | 1       | 1       | 1       | 1      | 1     | 1         | 1          | 7   |
| miR-570-3p | <i>CPM</i>       | 1       | 1       | 1       | 1      | 1     | 1         | 1          | 7   |
| miR-570-3p | <i>DLG2</i>      | 1       | 1       | 1       | 1      | 1     | 1         | 1          | 7   |
| miR-570-3p | <i>EDNRB</i>     | 1       | 1       | 1       | 1      | 1     | 1         | 1          | 7   |
| miR-570-3p | <i>ERCC4</i>     | 1       | 1       | 1       | 1      | 1     | 1         | 1          | 7   |
| miR-570-3p | <i>FSHB</i>      | 1       | 1       | 1       | 1      | 1     | 1         | 1          | 7   |
| miR-570-3p | <i>GCNT2</i>     | 1       | 1       | 1       | 1      | 1     | 1         | 1          | 7   |
| miR-570-3p | <i>NR3C1</i>     | 1       | 1       | 1       | 1      | 1     | 1         | 1          | 7   |
| miR-570-3p | <i>GSK3B</i>     | 1       | 1       | 1       | 1      | 1     | 1         | 1          | 7   |
| miR-570-3p | <i>LIPA</i>      | 1       | 1       | 1       | 1      | 1     | 1         | 1          | 7   |
| miR-570-3p | <i>LRP6</i>      | 1       | 1       | 1       | 1      | 1     | 1         | 1          | 7   |
| miR-570-3p | <i>MARCKS</i>    | 1       | 1       | 1       | 1      | 1     | 1         | 1          | 7   |
| miR-570-3p | <i>MDM4</i>      | 1       | 1       | 1       | 1      | 1     | 1         | 1          | 7   |
| miR-570-3p | <i>MEF2C</i>     | 1       | 1       | 1       | 1      | 1     | 1         | 1          | 7   |
| miR-570-3p | <i>MEF2D</i>     | 1       | 1       | 1       | 1      | 1     | 1         | 1          | 7   |
| miR-570-3p | <i>KMT2A</i>     | 1       | 1       | 1       | 1      | 1     | 1         | 1          | 7   |
| miR-570-3p | <i>MTM1</i>      | 1       | 1       | 1       | 1      | 1     | 1         | 1          | 7   |
| miR-570-3p | <i>MTM1</i>      | 1       | 1       | 1       | 1      | 1     | 1         | 1          | 7   |
| miR-570-3p | <i>NEATC2</i>    | 1       | 1       | 1       | 1      | 1     | 1         | 1          | 7   |
| miR-570-3p | <i>NMT1</i>      | 1       | 1       | 1       | 1      | 1     | 1         | 1          | 7   |
| miR-570-3p | <i>PBX1</i>      | 1       | 1       | 1       | 1      | 1     | 1         | 1          | 7   |
| miR-570-3p | <i>PLXNA2</i>    | 1       | 1       | 1       | 1      | 1     | 1         | 1          | 7   |
| miR-570-3p | <i>PMP2</i>      | 1       | 1       | 1       | 1      | 1     | 1         | 1          | 7   |
| miR-570-3p | <i>KDM5A</i>     | 1       | 1       | 1       | 1      | 1     | 1         | 1          | 7   |
| miR-570-3p | <i>RFX3</i>      | 1       | 1       | 1       | 1      | 1     | 1         | 1          | 7   |
| miR-570-3p | <i>RORA</i>      | 1       | 1       | 1       | 1      | 1     | 1         | 1          | 7   |
| miR-570-3p | <i>RPS6KA3</i>   | 1       | 1       | 1       | 1      | 1     | 1         | 1          | 7   |
| miR-570-3p | <i>ATXN7</i>     | 1       | 1       | 1       | 1      | 1     | 1         | 1          | 7   |
| miR-570-3p | <i>ITSN1</i>     | 1       | 1       | 1       | 1      | 1     | 1         | 1          | 7   |
| miR-570-3p | <i>SNTB2</i>     | 1       | 1       | 1       | 1      | 1     | 1         | 1          | 7   |
| miR-570-3p | <i>SRPK1</i>     | 1       | 1       | 1       | 1      | 1     | 1         | 1          | 7   |
| miR-570-3p | <i>TROVE2</i>    | 1       | 1       | 1       | 1      | 1     | 1         | 1          | 7   |

Table S1: Continued

| miRNA      | Gene             | miRWalk | Microt4 | miRanda | miRMap | RNA22 | RNAhybrid | Targetscan | SUM |
|------------|------------------|---------|---------|---------|--------|-------|-----------|------------|-----|
| miR-570-3p | <i>SSR1</i>      | 1       | 1       | 1       | 1      | 1     | 1         | 1          | 7   |
| miR-570-3p | <i>ST13</i>      | 1       | 1       | 1       | 1      | 1     | 1         | 1          | 7   |
| miR-570-3p | <i>STK4</i>      | 1       | 1       | 1       | 1      | 1     | 1         | 1          | 7   |
| miR-570-3p | <i>GCFC2</i>     | 1       | 1       | 1       | 1      | 1     | 1         | 1          | 7   |
| miR-570-3p | <i>TCF12</i>     | 1       | 1       | 1       | 1      | 1     | 1         | 1          | 7   |
| miR-570-3p | <i>TRAPPC10</i>  | 1       | 1       | 1       | 1      | 1     | 1         | 1          | 7   |
| miR-570-3p | <i>TPD52</i>     | 1       | 1       | 1       | 1      | 1     | 1         | 1          | 7   |
| miR-570-3p | <i>TPM2</i>      | 1       | 1       | 1       | 1      | 1     | 1         | 1          | 7   |
| miR-570-3p | <i>TRPS1</i>     | 1       | 1       | 1       | 1      | 1     | 1         | 1          | 7   |
| miR-570-3p | <i>UBP1</i>      | 1       | 1       | 1       | 1      | 1     | 1         | 1          | 7   |
| miR-570-3p | <i>NRIP1</i>     | 1       | 1       | 1       | 1      | 1     | 1         | 1          | 7   |
| miR-570-3p | <i>FZD4</i>      | 1       | 1       | 1       | 1      | 1     | 1         | 1          | 7   |
| miR-570-3p | <i>HIST2H2BE</i> | 1       | 1       | 1       | 1      | 1     | 1         | 1          | 7   |
| miR-570-3p | <i>TNKS</i>      | 1       | 1       | 1       | 1      | 1     | 1         | 1          | 7   |
| miR-570-3p | <i>NRP1</i>      | 1       | 1       | 1       | 1      | 1     | 1         | 1          | 7   |
| miR-570-3p | <i>ATG12</i>     | 1       | 1       | 1       | 1      | 1     | 1         | 1          | 7   |
| miR-570-3p | <i>REPS2</i>     | 1       | 1       | 1       | 1      | 1     | 1         | 1          | 7   |
| miR-570-3p | <i>VAPA</i>      | 1       | 1       | 1       | 1      | 1     | 1         | 1          | 7   |
| miR-570-3p | <i>DLGAP1</i>    | 1       | 1       | 1       | 1      | 1     | 1         | 1          | 7   |
| miR-570-3p | <i>BAG4</i>      | 1       | 1       | 1       | 1      | 1     | 1         | 1          | 7   |
| miR-570-3p | <i>LRRRC14</i>   | 1       | 1       | 1       | 1      | 1     | 1         | 1          | 7   |
| miR-570-3p | <i>HDAC4</i>     | 1       | 1       | 1       | 1      | 1     | 1         | 1          | 7   |
| miR-570-3p | <i>BCLAF1</i>    | 1       | 1       | 1       | 1      | 1     | 1         | 1          | 7   |
| miR-570-3p | <i>ZBTB39</i>    | 1       | 1       | 1       | 1      | 1     | 1         | 1          | 7   |
| miR-570-3p | <i>SRGAP3</i>    | 1       | 1       | 1       | 1      | 1     | 1         | 1          | 7   |
| miR-570-3p | <i>PTBP3</i>     | 1       | 1       | 1       | 1      | 1     | 1         | 1          | 7   |
| miR-570-3p | <i>AKT3</i>      | 1       | 1       | 1       | 1      | 1     | 1         | 1          | 7   |
| miR-570-3p | <i>TSPAN3</i>    | 1       | 1       | 1       | 1      | 1     | 1         | 1          | 7   |
| miR-570-3p | <i>OPTN</i>      | 1       | 1       | 1       | 1      | 1     | 1         | 1          | 7   |
| miR-570-3p | <i>HMG20A</i>    | 1       | 1       | 1       | 1      | 1     | 1         | 1          | 7   |
| miR-570-3p | <i>SYNPO</i>     | 1       | 1       | 1       | 1      | 1     | 1         | 1          | 7   |
| miR-570-3p | <i>RRAS2</i>     | 1       | 1       | 1       | 1      | 1     | 1         | 1          | 7   |
| miR-570-3p | <i>IKZF2</i>     | 1       | 1       | 1       | 1      | 1     | 1         | 1          | 7   |
| miR-570-3p | <i>MTF2</i>      | 1       | 1       | 1       | 1      | 1     | 1         | 1          | 7   |
| miR-570-3p | <i>COBLL1</i>    | 1       | 1       | 1       | 1      | 1     | 1         | 1          | 7   |
| miR-570-3p | <i>ZNF507</i>    | 1       | 1       | 1       | 1      | 1     | 1         | 1          | 7   |
| miR-570-3p | <i>PDS5B</i>     | 1       | 1       | 1       | 1      | 1     | 1         | 1          | 7   |
| miR-570-3p | <i>TBC1D2B</i>   | 1       | 1       | 1       | 1      | 1     | 1         | 1          | 7   |
| miR-570-3p | <i>GSE1</i>      | 1       | 1       | 1       | 1      | 1     | 1         | 1          | 7   |
| miR-570-3p | <i>WSCD1</i>     | 1       | 1       | 1       | 1      | 1     | 1         | 1          | 7   |

Table S1: Continued

| miRNA      | Gene            | miRWalk | Microt4 | miRanda | miRMap | RNA22 | RNAhybrid | Targetscan | SUM |
|------------|-----------------|---------|---------|---------|--------|-------|-----------|------------|-----|
| miR-570-3p | <i>CRTC1</i>    | 1       | 1       | 1       | 1      | 1     | 1         | 1          | 7   |
| miR-570-3p | <i>LRRC8B</i>   | 1       | 1       | 1       | 1      | 1     | 1         | 1          | 7   |
| miR-570-3p | <i>ZNF451</i>   | 1       | 1       | 1       | 1      | 1     | 1         | 1          | 7   |
| miR-570-3p | <i>ZBTB20</i>   | 1       | 1       | 1       | 1      | 1     | 1         | 1          | 7   |
| miR-570-3p | <i>RBMS3</i>    | 1       | 1       | 1       | 1      | 1     | 1         | 1          | 7   |
| miR-570-3p | <i>KCNMB4</i>   | 1       | 1       | 1       | 1      | 1     | 1         | 1          | 7   |
| miR-570-3p | <i>ZBTB44</i>   | 1       | 1       | 1       | 1      | 1     | 1         | 1          | 7   |
| miR-570-3p | <i>TMOD2</i>    | 1       | 1       | 1       | 1      | 1     | 1         | 1          | 7   |
| miR-570-3p | <i>TRA2A</i>    | 1       | 1       | 1       | 1      | 1     | 1         | 1          | 7   |
| miR-570-3p | <i>UBIAD1</i>   | 1       | 1       | 1       | 1      | 1     | 1         | 1          | 7   |
| miR-570-3p | <i>RNF141</i>   | 1       | 1       | 1       | 1      | 1     | 1         | 1          | 7   |
| miR-570-3p | <i>DCTN4</i>    | 1       | 1       | 1       | 1      | 1     | 1         | 1          | 7   |
| miR-570-3p | <i>SSI8L2</i>   | 1       | 1       | 1       | 1      | 1     | 1         | 1          | 7   |
| miR-570-3p | <i>FAM53C</i>   | 1       | 1       | 1       | 1      | 1     | 1         | 1          | 7   |
| miR-570-3p | <i>DACT1</i>    | 1       | 1       | 1       | 1      | 1     | 1         | 1          | 7   |
| miR-570-3p | <i>RAPGEF6</i>  | 1       | 1       | 1       | 1      | 1     | 1         | 1          | 7   |
| miR-570-3p | <i>RSF1</i>     | 1       | 1       | 1       | 1      | 1     | 1         | 1          | 7   |
| miR-570-3p | <i>SNRK</i>     | 1       | 1       | 1       | 1      | 1     | 1         | 1          | 7   |
| miR-570-3p | <i>COMMD4</i>   | 1       | 1       | 1       | 1      | 1     | 1         | 1          | 7   |
| miR-570-3p | <i>FAM120C</i>  | 1       | 1       | 1       | 1      | 1     | 1         | 1          | 7   |
| miR-570-3p | <i>STRBP</i>    | 1       | 1       | 1       | 1      | 1     | 1         | 1          | 7   |
| miR-570-3p | <i>MBNL3</i>    | 1       | 1       | 1       | 1      | 1     | 1         | 1          | 7   |
| miR-570-3p | <i>EIF5A2</i>   | 1       | 1       | 1       | 1      | 1     | 1         | 1          | 7   |
| miR-570-3p | <i>SMARCAD1</i> | 1       | 1       | 1       | 1      | 1     | 1         | 1          | 7   |
| miR-570-3p | <i>PELI1</i>    | 1       | 1       | 1       | 1      | 1     | 1         | 1          | 7   |
| miR-570-3p | <i>HEG1</i>     | 1       | 1       | 1       | 1      | 1     | 1         | 1          | 7   |
| miR-570-3p | <i>CGN</i>      | 1       | 1       | 1       | 1      | 1     | 1         | 1          | 7   |
| miR-570-3p | <i>TAOK1</i>    | 1       | 1       | 1       | 1      | 1     | 1         | 1          | 7   |
| miR-570-3p | <i>STIM2</i>    | 1       | 1       | 1       | 1      | 1     | 1         | 1          | 7   |
| miR-570-3p | <i>NYAP2</i>    | 1       | 1       | 1       | 1      | 1     | 1         | 1          | 7   |
| miR-570-3p | <i>ALS2</i>     | 1       | 1       | 1       | 1      | 1     | 1         | 1          | 7   |
| miR-570-3p | <i>USP37</i>    | 1       | 1       | 1       | 1      | 1     | 1         | 1          | 7   |
| miR-570-3p | <i>TRAK2</i>    | 1       | 1       | 1       | 1      | 1     | 1         | 1          | 7   |
| miR-570-3p | <i>ARSJ</i>     | 1       | 1       | 1       | 1      | 1     | 1         | 1          | 7   |
| miR-570-3p | <i>PEAK1</i>    | 1       | 1       | 1       | 1      | 1     | 1         | 1          | 7   |
| miR-570-3p | <i>SRCIN1</i>   | 1       | 1       | 1       | 1      | 1     | 1         | 1          | 7   |
| miR-570-3p | <i>NUAK2</i>    | 1       | 1       | 1       | 1      | 1     | 1         | 1          | 7   |
| miR-570-3p | <i>APH1B</i>    | 1       | 1       | 1       | 1      | 1     | 1         | 1          | 7   |
| miR-570-3p | <i>SPRTN</i>    | 1       | 1       | 1       | 1      | 1     | 1         | 1          | 7   |
| miR-570-3p | <i>KATNAL1</i>  | 1       | 1       | 1       | 1      | 1     | 1         | 1          | 7   |

Table S1: Continued

| miRNA      | Gene             | miRWalk | Microt4 | miRanda | miRMap | RNA22 | RNAhybrid | Targetscan | SUM      |
|------------|------------------|---------|---------|---------|--------|-------|-----------|------------|----------|
| miR-570-3p | <i>NFATC2IP</i>  | 1       | 1       | 1       | 1      | 1     | 1         | 1          | 7        |
| miR-570-3p | <i>NAV1</i>      | 1       | 1       | 1       | 1      | 1     | 1         | 1          | 7        |
| miR-570-3p | <i>TP53INP1</i>  | 1       | 1       | 1       | 1      | 1     | 1         | 1          | 7        |
| miR-570-3p | <i>C19orf47</i>  | 1       | 1       | 1       | 1      | 1     | 1         | 1          | 7        |
| miR-570-3p | <i>TCEANC2</i>   | 1       | 1       | 1       | 1      | 1     | 1         | 1          | 7        |
| miR-570-3p | <i>CPEB2</i>     | 1       | 1       | 1       | 1      | 1     | 1         | 1          | 7        |
| miR-570-3p | <i>FAM199X</i>   | 1       | 1       | 1       | 1      | 1     | 1         | 1          | 7        |
| miR-570-3p | <i>C20orf112</i> | 1       | 1       | 1       | 1      | 1     | 1         | 1          | 7        |
| miR-570-3p | <i>NRSN1</i>     | 1       | 1       | 1       | 1      | 1     | 1         | 1          | 7        |
| miR-570-3p | <i>RC3H1</i>     | 1       | 1       | 1       | 1      | 1     | 1         | 1          | 7        |
| miR-570-3p | <i>FAM117B</i>   | 1       | 1       | 1       | 1      | 1     | 1         | 1          | 7        |
| miR-570-3p | <i>AMOTL1</i>    | 1       | 1       | 1       | 1      | 1     | 1         | 1          | 7        |
| miR-570-3p | <i>ZXDB</i>      | 1       | 1       | 1       | 1      | 1     | 1         | 1          | 7        |
| miR-570-3p | <i>PIKFYVE</i>   | 1       | 1       | 1       | 1      | 1     | 1         | 1          | 7        |
| miR-570-3p | <i>AMER2</i>     | 1       | 1       | 1       | 1      | 1     | 1         | 1          | 7        |
| miR-570-3p | <i>SEMA3D</i>    | 1       | 1       | 1       | 1      | 1     | 1         | 1          | 7        |
| miR-570-3p | <i>SLC17A8</i>   | 1       | 1       | 1       | 1      | 1     | 1         | 1          | 7        |
| miR-570-3p | <i>GXYLT1</i>    | 1       | 1       | 1       | 1      | 1     | 1         | 1          | 7        |
| miR-570-3p | <i>ZNF445</i>    | 1       | 1       | 1       | 1      | 1     | 1         | 1          | 7        |
| miR-570-3p | <i>YPEL2</i>     | 1       | 1       | 1       | 1      | 1     | 1         | 1          | 7        |
| miR-570-3p | <i>BEND4</i>     | 1       | 1       | 1       | 1      | 1     | 1         | 1          | 7        |
| miR-570-3p | <i>ZBTB34</i>    | 1       | 1       | 1       | 1      | 1     | 1         | 1          | 7        |
| miR-570-3p | <i>PSAPL1</i>    | 1       | 1       | 1       | 1      | 1     | 1         | 1          | 7        |
| miR-570-3p | <b>CD44</b>      | 0       | 1       | 1       | 1      | 1     | 1         | 1          | <b>6</b> |
| miR-570-3p | <i>ABL2</i>      | 1       | 1       | 1       | 1      | 0     | 1         | 1          | 6        |
| miR-570-3p | <i>ACADSB</i>    | 1       | 1       | 1       | 1      | 0     | 1         | 1          | 6        |
| miR-570-3p | <i>ACOX1</i>     | 1       | 1       | 1       | 1      | 0     | 1         | 1          | 6        |
| miR-570-3p | <i>ACVR1</i>     | 1       | 1       | 1       | 1      | 0     | 1         | 1          | 6        |
| miR-570-3p | <i>ADH5</i>      | 0       | 1       | 1       | 1      | 1     | 1         | 1          | 6        |
| miR-570-3p | <i>APIG1</i>     | 1       | 1       | 1       | 1      | 0     | 1         | 1          | 6        |
| miR-570-3p | <i>AK2</i>       | 1       | 1       | 1       | 1      | 0     | 1         | 1          | 6        |
| miR-570-3p | <i>BIN1</i>      | 1       | 1       | 1       | 1      | 0     | 1         | 1          | 6        |
| miR-570-3p | <i>APBB2</i>     | 1       | 1       | 1       | 1      | 0     | 1         | 1          | 6        |
| miR-570-3p | <i>RND3</i>      | 1       | 1       | 1       | 1      | 0     | 1         | 1          | 6        |
| miR-570-3p | <i>ARNT</i>      | 1       | 1       | 1       | 1      | 0     | 1         | 1          | 6        |
| miR-570-3p | <i>ASTN1</i>     | 1       | 1       | 1       | 1      | 0     | 1         | 1          | 6        |
| miR-570-3p | <i>RERE</i>      | 1       | 1       | 1       | 1      | 0     | 1         | 1          | 6        |
| miR-570-3p | <i>ATP1B1</i>    | 1       | 1       | 1       | 1      | 0     | 1         | 1          | 6        |
| miR-570-3p | <i>ATP1B2</i>    | 1       | 1       | 1       | 1      | 0     | 1         | 1          | 6        |
| miR-570-3p | <i>ATP2A2</i>    | 1       | 1       | 1       | 1      | 0     | 1         | 1          | 6        |

Table S1: Continued

| miRNA      | Gene            | miRWalk | Microt4 | miRanda | miRMap | RNA22 | RNAhybrid | Targetscan | SUM |
|------------|-----------------|---------|---------|---------|--------|-------|-----------|------------|-----|
| miR-570-3p | <i>ATP2B1</i>   | 1       | 1       | 1       | 1      | 0     | 1         | 1          | 6   |
| miR-570-3p | <i>ATP2B2</i>   | 1       | 1       | 1       | 1      | 0     | 1         | 1          | 6   |
| miR-570-3p | <i>ATP2B3</i>   | 1       | 1       | 1       | 1      | 0     | 1         | 1          | 6   |
| miR-570-3p | <i>ATP2B3</i>   | 1       | 1       | 1       | 1      | 0     | 1         | 1          | 6   |
| miR-570-3p | <i>ATP2B4</i>   | 1       | 1       | 1       | 1      | 0     | 1         | 1          | 6   |
| miR-570-3p | <i>ALDH7A1</i>  | 1       | 1       | 1       | 1      | 0     | 1         | 1          | 6   |
| miR-570-3p | <i>ALDH7A1</i>  | 1       | 1       | 1       | 1      | 0     | 1         | 1          | 6   |
| miR-570-3p | <i>ATP6V1B2</i> | 1       | 1       | 1       | 1      | 0     | 1         | 1          | 6   |
| miR-570-3p | <i>ATP7A</i>    | 1       | 1       | 1       | 1      | 0     | 1         | 1          | 6   |
| miR-570-3p | <i>ATP7A</i>    | 1       | 1       | 1       | 1      | 0     | 1         | 1          | 6   |
| miR-570-3p | <i>ATP7B</i>    | 1       | 1       | 1       | 1      | 0     | 1         | 1          | 6   |
| miR-570-3p | <i>BACH1</i>    | 1       | 1       | 1       | 1      | 0     | 1         | 1          | 6   |
| miR-570-3p | <i>BAG1</i>     | 1       | 1       | 1       | 1      | 0     | 1         | 1          | 6   |
| miR-570-3p | <i>BAG1</i>     | 1       | 1       | 1       | 1      | 0     | 1         | 1          | 6   |
| miR-570-3p | <i>BAI3</i>     | 1       | 1       | 1       | 1      | 0     | 1         | 1          | 6   |
| miR-570-3p | <i>BCL2L2</i>   | 1       | 1       | 1       | 1      | 0     | 1         | 1          | 6   |
| miR-570-3p | <i>BCL9</i>     | 1       | 1       | 1       | 1      | 0     | 1         | 1          | 6   |
| miR-570-3p | <i>BICD1</i>    | 1       | 1       | 1       | 1      | 0     | 1         | 1          | 6   |
| miR-570-3p | <i>BIK</i>      | 1       | 1       | 1       | 1      | 0     | 1         | 1          | 6   |
| miR-570-3p | <i>BNC1</i>     | 1       | 1       | 1       | 1      | 0     | 1         | 1          | 6   |
| miR-570-3p | <i>BMP2</i>     | 1       | 1       | 1       | 1      | 0     | 1         | 1          | 6   |
| miR-570-3p | <i>BMP3</i>     | 1       | 1       | 1       | 1      | 0     | 1         | 1          | 6   |
| miR-570-3p | <i>BMP7</i>     | 1       | 1       | 1       | 1      | 0     | 1         | 1          | 6   |
| miR-570-3p | <i>BMPR1B</i>   | 1       | 1       | 1       | 1      | 0     | 1         | 1          | 6   |
| miR-570-3p | <i>BMPR2</i>    | 1       | 1       | 1       | 1      | 0     | 1         | 1          | 6   |
| miR-570-3p | <i>KLF9</i>     | 1       | 1       | 1       | 1      | 0     | 1         | 1          | 6   |
| miR-570-3p | <i>OSGIN2</i>   | 1       | 1       | 1       | 1      | 0     | 1         | 1          | 6   |
| miR-570-3p | <i>MPPED2</i>   | 1       | 1       | 1       | 1      | 0     | 1         | 1          | 6   |
| miR-570-3p | <i>CACNA1B</i>  | 1       | 1       | 1       | 1      | 0     | 1         | 1          | 6   |
| miR-570-3p | <i>CACNA1E</i>  | 1       | 1       | 1       | 1      | 0     | 1         | 1          | 6   |
| miR-570-3p | <i>CACNB4</i>   | 1       | 1       | 1       | 1      | 0     | 1         | 1          | 6   |
| miR-570-3p | <i>CALB1</i>    | 1       | 1       | 1       | 1      | 0     | 1         | 1          | 6   |
| miR-570-3p | <i>CALD1</i>    | 1       | 1       | 1       | 1      | 0     | 1         | 1          | 6   |
| miR-570-3p | <i>CCND2</i>    | 1       | 1       | 1       | 1      | 0     | 1         | 1          | 6   |
| miR-570-3p | <i>CD28</i>     | 1       | 1       | 1       | 1      | 0     | 1         | 1          | 6   |
| miR-570-3p | <i>CIRBP</i>    | 1       | 1       | 0       | 1      | 1     | 1         | 1          | 6   |
| miR-570-3p | <i>CLCN3</i>    | 1       | 1       | 1       | 1      | 0     | 1         | 1          | 6   |
| miR-570-3p | <i>CMKLR1</i>   | 1       | 1       | 1       | 1      | 0     | 1         | 1          | 6   |
| miR-570-3p | <i>COL4A4</i>   | 1       | 1       | 1       | 1      | 0     | 1         | 1          | 6   |
| miR-570-3p | <i>COL8A2</i>   | 1       | 1       | 1       | 1      | 0     | 1         | 1          | 6   |

Table S1: Continued

| miRNA      | Gene            | miRWalk | Microt4 | miRanda | miRMap | RNA22 | RNAhybrid | Targetscan | SUM |
|------------|-----------------|---------|---------|---------|--------|-------|-----------|------------|-----|
| miR-570-3p | <i>KLF6</i>     | 1       | 1       | 1       | 1      | 0     | 1         | 1          | 6   |
| miR-570-3p | <i>CPD</i>      | 1       | 1       | 1       | 1      | 0     | 1         | 1          | 6   |
| miR-570-3p | <i>CREBBP</i>   | 1       | 1       | 1       | 1      | 0     | 1         | 1          | 6   |
| miR-570-3p | <i>CREBL2</i>   | 0       | 1       | 1       | 1      | 1     | 1         | 1          | 6   |
| miR-570-3p | <i>CRKL</i>     | 1       | 1       | 1       | 1      | 0     | 1         | 1          | 6   |
| miR-570-3p | <i>HAPLN1</i>   | 1       | 1       | 1       | 1      | 0     | 1         | 1          | 6   |
| miR-570-3p | <i>CYLD</i>     | 1       | 1       | 1       | 1      | 0     | 1         | 1          | 6   |
| miR-570-3p | <i>CYP26A1</i>  | 1       | 1       | 1       | 1      | 0     | 1         | 1          | 6   |
| miR-570-3p | <i>DAB1</i>     | 1       | 1       | 1       | 1      | 0     | 1         | 1          | 6   |
| miR-570-3p | <i>DAG1</i>     | 1       | 1       | 1       | 1      | 0     | 1         | 1          | 6   |
| miR-570-3p | <i>DGKB</i>     | 1       | 1       | 1       | 1      | 0     | 1         | 1          | 6   |
| miR-570-3p | <i>DCX</i>      | 1       | 1       | 1       | 1      | 0     | 1         | 1          | 6   |
| miR-570-3p | <i>DMXL1</i>    | 0       | 1       | 1       | 1      | 1     | 1         | 1          | 6   |
| miR-570-3p | <i>DLX2</i>     | 1       | 1       | 1       | 1      | 0     | 1         | 1          | 6   |
| miR-570-3p | <i>DMD</i>      | 0       | 1       | 1       | 1      | 1     | 1         | 1          | 6   |
| miR-570-3p | <i>DPYSL3</i>   | 1       | 1       | 1       | 1      | 0     | 1         | 1          | 6   |
| miR-570-3p | <i>DSC3</i>     | 1       | 1       | 1       | 1      | 0     | 1         | 1          | 6   |
| miR-570-3p | <i>DTNA</i>     | 1       | 1       | 1       | 1      | 0     | 1         | 1          | 6   |
| miR-570-3p | <i>DUSP4</i>    | 0       | 1       | 1       | 1      | 1     | 1         | 1          | 6   |
| miR-570-3p | <i>DUSP8</i>    | 1       | 1       | 1       | 1      | 0     | 1         | 1          | 6   |
| miR-570-3p | <i>DVL3</i>     | 1       | 1       | 1       | 1      | 0     | 1         | 1          | 6   |
| miR-570-3p | <i>EFNA5</i>    | 1       | 1       | 1       | 1      | 0     | 1         | 1          | 6   |
| miR-570-3p | <i>EIF4G2</i>   | 1       | 1       | 1       | 1      | 0     | 1         | 1          | 6   |
| miR-570-3p | <i>SERPINB1</i> | 1       | 1       | 1       | 1      | 0     | 1         | 1          | 6   |
| miR-570-3p | <i>ELAVL2</i>   | 1       | 1       | 1       | 1      | 0     | 1         | 1          | 6   |
| miR-570-3p | <i>ELAVL1</i>   | 1       | 1       | 1       | 1      | 0     | 1         | 1          | 6   |
| miR-570-3p | <i>ELK4</i>     | 0       | 1       | 1       | 1      | 1     | 1         | 1          | 6   |
| miR-570-3p | <i>EPHA3</i>    | 1       | 1       | 1       | 1      | 0     | 1         | 1          | 6   |
| miR-570-3p | <i>EPHA5</i>    | 1       | 1       | 1       | 1      | 0     | 1         | 1          | 6   |
| miR-570-3p | <i>EPHA7</i>    | 1       | 1       | 1       | 1      | 0     | 1         | 1          | 6   |
| miR-570-3p | <i>EYA4</i>     | 1       | 1       | 1       | 1      | 0     | 1         | 1          | 6   |
| miR-570-3p | <i>ERG</i>      | 1       | 1       | 1       | 1      | 0     | 1         | 1          | 6   |
| miR-570-3p | <i>ESR1</i>     | 1       | 1       | 1       | 1      | 0     | 1         | 1          | 6   |
| miR-570-3p | <i>ETS1</i>     | 1       | 1       | 1       | 1      | 0     | 1         | 1          | 6   |
| miR-570-3p | <i>ETS2</i>     | 0       | 1       | 1       | 1      | 1     | 1         | 1          | 6   |
| miR-570-3p | <i>ETV5</i>     | 0       | 1       | 1       | 1      | 1     | 1         | 1          | 6   |
| miR-570-3p | <i>ETV6</i>     | 1       | 1       | 1       | 1      | 0     | 1         | 1          | 6   |
| miR-570-3p | <i>EYA1</i>     | 1       | 1       | 1       | 1      | 0     | 1         | 1          | 6   |
| miR-570-3p | <i>EZH1</i>     | 1       | 1       | 1       | 1      | 0     | 1         | 1          | 6   |
| miR-570-3p | <i>FGF2</i>     | 1       | 1       | 1       | 1      | 0     | 1         | 1          | 6   |

Table S1: Continued

| miRNA      | Gene           | miRWalk | Microt4 | miRanda | miRMap | RNA22 | RNAhybrid | Targetscan | SUM |
|------------|----------------|---------|---------|---------|--------|-------|-----------|------------|-----|
| miR-570-3p | <i>FOXO3</i>   | 0       | 1       | 1       | 1      | 1     | 1         | 1          | 6   |
| miR-570-3p | <i>FMR1</i>    | 1       | 1       | 1       | 1      | 0     | 1         | 1          | 6   |
| miR-570-3p | <i>AFF2</i>    | 1       | 1       | 1       | 1      | 0     | 1         | 1          | 6   |
| miR-570-3p | <i>FUT1</i>    | 1       | 1       | 1       | 1      | 0     | 1         | 1          | 6   |
| miR-570-3p | <i>FUT1</i>    | 1       | 1       | 1       | 1      | 0     | 1         | 1          | 6   |
| miR-570-3p | <i>KDSR</i>    | 1       | 1       | 1       | 1      | 0     | 1         | 1          | 6   |
| miR-570-3p | <i>GABPA</i>   | 1       | 1       | 1       | 1      | 0     | 1         | 1          | 6   |
| miR-570-3p | <i>GABRA1</i>  | 1       | 1       | 1       | 1      | 0     | 1         | 1          | 6   |
| miR-570-3p | <i>GABRA4</i>  | 0       | 1       | 1       | 1      | 1     | 1         | 1          | 6   |
| miR-570-3p | <i>GABRB2</i>  | 0       | 1       | 1       | 1      | 1     | 1         | 1          | 6   |
| miR-570-3p | <i>GANC</i>    | 1       | 1       | 1       | 1      | 0     | 1         | 1          | 6   |
| miR-570-3p | <i>NR6A1</i>   | 1       | 1       | 1       | 1      | 0     | 1         | 1          | 6   |
| miR-570-3p | <i>GDNF</i>    | 1       | 1       | 1       | 1      | 0     | 1         | 1          | 6   |
| miR-570-3p | <i>GFRA1</i>   | 1       | 1       | 1       | 1      | 0     | 1         | 1          | 6   |
| miR-570-3p | <i>GPC3</i>    | 1       | 1       | 1       | 1      | 0     | 1         | 1          | 6   |
| miR-570-3p | <i>GLS</i>     | 1       | 1       | 1       | 1      | 0     | 1         | 1          | 6   |
| miR-570-3p | <i>GNAI1</i>   | 1       | 1       | 1       | 1      | 0     | 1         | 1          | 6   |
| miR-570-3p | <i>GNAL</i>    | 0       | 1       | 1       | 1      | 1     | 1         | 1          | 6   |
| miR-570-3p | <i>GNG4</i>    | 0       | 1       | 1       | 1      | 1     | 1         | 1          | 6   |
| miR-570-3p | <i>GPD2</i>    | 1       | 1       | 1       | 1      | 0     | 1         | 1          | 6   |
| miR-570-3p | <i>GPM6A</i>   | 0       | 1       | 1       | 1      | 1     | 1         | 1          | 6   |
| miR-570-3p | <i>RAPGEF1</i> | 1       | 1       | 1       | 1      | 0     | 1         | 1          | 6   |
| miR-570-3p | <i>GRIA3</i>   | 0       | 1       | 1       | 1      | 1     | 1         | 1          | 6   |
| miR-570-3p | <i>GRIA3</i>   | 0       | 1       | 1       | 1      | 1     | 1         | 1          | 6   |
| miR-570-3p | <i>GRIK2</i>   | 1       | 1       | 1       | 1      | 0     | 1         | 1          | 6   |
| miR-570-3p | <i>GRM1</i>    | 1       | 1       | 1       | 1      | 0     | 1         | 1          | 6   |
| miR-570-3p | <i>GRM7</i>    | 1       | 1       | 1       | 1      | 0     | 1         | 1          | 6   |
| miR-570-3p | <i>GRSF1</i>   | 1       | 1       | 1       | 1      | 0     | 1         | 1          | 6   |
| miR-570-3p | <i>GSPT1</i>   | 1       | 1       | 1       | 1      | 0     | 1         | 1          | 6   |
| miR-570-3p | <i>GUCY1A2</i> | 1       | 1       | 1       | 1      | 0     | 1         | 1          | 6   |
| miR-570-3p | <i>HAS3</i>    | 1       | 1       | 1       | 1      | 0     | 1         | 1          | 6   |
| miR-570-3p | <i>HCFC1</i>   | 1       | 1       | 1       | 1      | 0     | 1         | 1          | 6   |
| miR-570-3p | <i>HCFC1</i>   | 1       | 1       | 1       | 1      | 0     | 1         | 1          | 6   |
| miR-570-3p | <i>HDAC2</i>   | 1       | 1       | 1       | 1      | 0     | 1         | 1          | 6   |
| miR-570-3p | <i>HGF</i>     | 0       | 1       | 1       | 1      | 1     | 1         | 1          | 6   |
| miR-570-3p | <i>HIP1</i>    | 1       | 1       | 1       | 1      | 0     | 1         | 1          | 6   |
| miR-570-3p | <i>HIP1</i>    | 1       | 1       | 1       | 1      | 0     | 1         | 1          | 6   |
| miR-570-3p | <i>UBE2K</i>   | 1       | 1       | 1       | 1      | 0     | 1         | 1          | 6   |
| miR-570-3p | <i>HLF</i>     | 1       | 1       | 1       | 1      | 0     | 1         | 1          | 6   |
| miR-570-3p | <i>HMGCS1</i>  | 1       | 1       | 1       | 1      | 0     | 1         | 1          | 6   |



Table S1: Continued

| miRNA      | Gene             | miRWalk | Microt4 | miRanda | miRMap | RNA22 | RNAhybrid | Targetscan | SUM |
|------------|------------------|---------|---------|---------|--------|-------|-----------|------------|-----|
| miR-570-3p | <i>HNF4G</i>     | 1       | 1       | 1       | 1      | 0     | 1         | 1          | 6   |
| miR-570-3p | <i>HNRNPA2B1</i> | 1       | 1       | 1       | 1      | 0     | 1         | 1          | 6   |
| miR-570-3p | <i>FOXP2</i>     | 1       | 1       | 1       | 1      | 0     | 1         | 1          | 6   |
| miR-570-3p | <i>HTR1E</i>     | 1       | 1       | 1       | 1      | 0     | 1         | 1          | 6   |
| miR-570-3p | <i>IFNAR1</i>    | 1       | 1       | 1       | 1      | 0     | 1         | 1          | 6   |
| miR-570-3p | <i>IGF1R</i>     | 0       | 1       | 1       | 1      | 1     | 1         | 1          | 6   |
| miR-570-3p | <i>IGFBP5</i>    | 1       | 1       | 1       | 1      | 0     | 1         | 1          | 6   |
| miR-570-3p | <i>RBPJ</i>      | 1       | 1       | 1       | 1      | 0     | 1         | 1          | 6   |
| miR-570-3p | <i>IL1RAP</i>    | 1       | 1       | 1       | 1      | 0     | 1         | 1          | 6   |
| miR-570-3p | <i>IL10</i>      | 1       | 1       | 1       | 1      | 0     | 1         | 1          | 6   |
| miR-570-3p | <i>INSR</i>      | 1       | 1       | 1       | 1      | 0     | 1         | 1          | 6   |
| miR-570-3p | <i>ISL1</i>      | 1       | 1       | 1       | 1      | 0     | 1         | 1          | 6   |
| miR-570-3p | <i>ITGB3</i>     | 1       | 1       | 1       | 1      | 0     | 1         | 1          | 6   |
| miR-570-3p | <i>ITPR2</i>     | 1       | 1       | 1       | 1      | 0     | 1         | 1          | 6   |
| miR-570-3p | <i>JAK2</i>      | 1       | 1       | 1       | 1      | 0     | 1         | 1          | 6   |
| miR-570-3p | <i>KCNJ3</i>     | 1       | 1       | 1       | 1      | 0     | 1         | 1          | 6   |
| miR-570-3p | <i>KCNJ13</i>    | 1       | 1       | 1       | 1      | 0     | 1         | 1          | 6   |
| miR-570-3p | <i>KCNMA1</i>    | 1       | 1       | 1       | 1      | 0     | 1         | 1          | 6   |
| miR-570-3p | <i>KIF5B</i>     | 1       | 1       | 1       | 1      | 0     | 1         | 1          | 6   |
| miR-570-3p | <i>KPNA3</i>     | 1       | 1       | 1       | 1      | 0     | 1         | 1          | 6   |
| miR-570-3p | <i>KPNA4</i>     | 1       | 1       | 1       | 1      | 0     | 1         | 1          | 6   |
| miR-570-3p | <i>IPO5</i>      | 0       | 1       | 1       | 1      | 1     | 1         | 1          | 6   |
| miR-570-3p | <i>LAMC1</i>     | 1       | 1       | 1       | 1      | 0     | 1         | 1          | 6   |
| miR-570-3p | <i>LAMP2</i>     | 0       | 1       | 1       | 1      | 1     | 1         | 1          | 6   |
| miR-570-3p | <i>LIFR</i>      | 1       | 1       | 1       | 1      | 0     | 1         | 1          | 6   |
| miR-570-3p | <i>LMX1A</i>     | 0       | 1       | 1       | 1      | 1     | 1         | 1          | 6   |
| miR-570-3p | <i>LPP</i>       | 0       | 1       | 1       | 1      | 1     | 1         | 1          | 6   |
| miR-570-3p | <i>MXD1</i>      | 0       | 1       | 1       | 1      | 1     | 1         | 1          | 6   |
| miR-570-3p | <i>SMAD3</i>     | 1       | 1       | 1       | 1      | 0     | 1         | 1          | 6   |
| miR-570-3p | <i>SMAD4</i>     | 1       | 1       | 1       | 1      | 0     | 1         | 1          | 6   |
| miR-570-3p | <i>MAF</i>       | 1       | 1       | 1       | 1      | 0     | 1         | 1          | 6   |
| miR-570-3p | <i>MBL2</i>      | 0       | 1       | 1       | 1      | 1     | 1         | 1          | 6   |
| miR-570-3p | <i>MBNL1</i>     | 0       | 1       | 1       | 1      | 1     | 1         | 1          | 6   |
| miR-570-3p | <i>MECP2</i>     | 1       | 1       | 1       | 1      | 0     | 1         | 1          | 6   |
| miR-570-3p | <i>MECP2</i>     | 1       | 1       | 1       | 1      | 0     | 1         | 1          | 6   |
| miR-570-3p | <i>MEF2A</i>     | 1       | 1       | 1       | 1      | 0     | 1         | 1          | 6   |
| miR-570-3p | <i>MEIS2</i>     | 1       | 1       | 1       | 1      | 0     | 1         | 1          | 6   |
| miR-570-3p | <i>MAP3K1</i>    | 1       | 1       | 1       | 1      | 0     | 1         | 1          | 6   |
| miR-570-3p | <i>MFAP1</i>     | 1       | 1       | 1       | 1      | 0     | 1         | 1          | 6   |
| miR-570-3p | <i>MFAP3</i>     | 1       | 1       | 1       | 1      | 0     | 1         | 1          | 6   |

Table S1: Continued

| miRNA      | Gene            | miRWalk | Microt4 | miRanda | miRMap | RNA22 | RNAhybrid | Targetscan | SUM |
|------------|-----------------|---------|---------|---------|--------|-------|-----------|------------|-----|
| miR-570-3p | <i>MGAT2</i>    | 1       | 1       | 1       | 1      | 0     | 1         | 1          | 6   |
| miR-570-3p | <i>MGAT5</i>    | 1       | 1       | 1       | 1      | 0     | 1         | 1          | 6   |
| miR-570-3p | <i>ATXN3</i>    | 1       | 1       | 1       | 1      | 0     | 1         | 1          | 6   |
| miR-570-3p | <i>AFF1</i>     | 1       | 1       | 1       | 1      | 0     | 1         | 1          | 6   |
| miR-570-3p | <i>AFF1</i>     | 1       | 1       | 1       | 1      | 0     | 1         | 1          | 6   |
| miR-570-3p | <i>MMP1</i>     | 1       | 1       | 1       | 1      | 0     | 1         | 1          | 6   |
| miR-570-3p | <i>MMP8</i>     | 1       | 1       | 1       | 1      | 0     | 1         | 1          | 6   |
| miR-570-3p | <i>MNI</i>      | 1       | 1       | 1       | 1      | 0     | 1         | 1          | 6   |
| miR-570-3p | <i>MYO1B</i>    | 1       | 1       | 1       | 1      | 0     | 1         | 1          | 6   |
| miR-570-3p | <i>MSX2</i>     | 1       | 1       | 1       | 1      | 0     | 1         | 1          | 6   |
| miR-570-3p | <i>MTAP</i>     | 1       | 1       | 1       | 1      | 0     | 1         | 1          | 6   |
| miR-570-3p | <i>MXII</i>     | 1       | 1       | 1       | 1      | 0     | 1         | 1          | 6   |
| miR-570-3p | <i>MYH9</i>     | 1       | 1       | 1       | 1      | 0     | 1         | 1          | 6   |
| miR-570-3p | <i>MYO1C</i>    | 1       | 1       | 1       | 1      | 0     | 1         | 1          | 6   |
| miR-570-3p | <i>MYO6</i>     | 1       | 1       | 1       | 1      | 0     | 1         | 1          | 6   |
| miR-570-3p | <i>MYO9A</i>    | 1       | 1       | 1       | 1      | 0     | 1         | 1          | 6   |
| miR-570-3p | <i>PPP1R12A</i> | 1       | 1       | 1       | 1      | 0     | 1         | 1          | 6   |
| miR-570-3p | <i>PPP1R12B</i> | 1       | 1       | 1       | 1      | 0     | 1         | 1          | 6   |
| miR-570-3p | <i>MYT1</i>     | 1       | 1       | 1       | 1      | 0     | 1         | 1          | 6   |
| miR-570-3p | <i>NAP1L2</i>   | 1       | 1       | 1       | 1      | 0     | 1         | 1          | 6   |
| miR-570-3p | <i>NAP1L4</i>   | 1       | 1       | 1       | 1      | 0     | 1         | 1          | 6   |
| miR-570-3p | <i>NBN</i>      | 1       | 1       | 1       | 1      | 0     | 1         | 1          | 6   |
| miR-570-3p | <i>NCAM1</i>    | 1       | 1       | 1       | 1      | 0     | 1         | 1          | 6   |
| miR-570-3p | <i>NCK1</i>     | 1       | 1       | 1       | 1      | 0     | 1         | 1          | 6   |
| miR-570-3p | <i>NDUFA4</i>   | 1       | 1       | 1       | 1      | 0     | 1         | 1          | 6   |
| miR-570-3p | <i>NDUFA5</i>   | 1       | 1       | 1       | 1      | 0     | 1         | 1          | 6   |
| miR-570-3p | <i>NDUFA10</i>  | 1       | 1       | 1       | 1      | 0     | 1         | 1          | 6   |
| miR-570-3p | <i>Sep-02</i>   | 1       | 1       | 1       | 1      | 0     | 1         | 1          | 6   |
| miR-570-3p | <i>NEDD9</i>    | 1       | 1       | 1       | 1      | 0     | 1         | 1          | 6   |
| miR-570-3p | <i>NEFH</i>     | 1       | 1       | 1       | 1      | 0     | 1         | 1          | 6   |
| miR-570-3p | <i>NEK1</i>     | 1       | 1       | 1       | 1      | 0     | 1         | 1          | 6   |
| miR-570-3p | <i>NEFATC1</i>  | 1       | 1       | 1       | 1      | 0     | 1         | 1          | 6   |
| miR-570-3p | <i>NFIA</i>     | 1       | 1       | 1       | 1      | 0     | 1         | 1          | 6   |
| miR-570-3p | <i>NEFATC3</i>  | 1       | 1       | 1       | 1      | 0     | 1         | 1          | 6   |
| miR-570-3p | <i>NFIB</i>     | 1       | 1       | 1       | 1      | 0     | 1         | 1          | 6   |
| miR-570-3p | <i>NFIC</i>     | 1       | 1       | 1       | 1      | 0     | 1         | 1          | 6   |
| miR-570-3p | <i>NFIX</i>     | 1       | 1       | 1       | 1      | 0     | 1         | 1          | 6   |
| miR-570-3p | <i>NFYB</i>     | 1       | 1       | 1       | 1      | 0     | 1         | 1          | 6   |
| miR-570-3p | <i>NHS</i>      | 1       | 1       | 1       | 1      | 0     | 1         | 1          | 6   |
| miR-570-3p | <i>NOS1</i>     | 1       | 1       | 1       | 1      | 0     | 1         | 1          | 6   |

Table S1: Continued

| miRNA      | Gene            | miRWalk | Microt4 | miRanda | miRMap | RNA22 | RNAhybrid | Targetscan | SUM |
|------------|-----------------|---------|---------|---------|--------|-------|-----------|------------|-----|
| miR-570-3p | <i>CNOT4</i>    | 1       | 1       | 1       | 1      | 0     | 1         | 1          | 6   |
| miR-570-3p | <i>NOTCH2</i>   | 1       | 1       | 1       | 1      | 0     | 1         | 1          | 6   |
| miR-570-3p | <i>NPR3</i>     | 1       | 1       | 1       | 1      | 0     | 1         | 1          | 6   |
| miR-570-3p | <i>NRAS</i>     | 1       | 1       | 1       | 1      | 0     | 1         | 1          | 6   |
| miR-570-3p | <i>NTRK2</i>    | 1       | 1       | 1       | 1      | 0     | 1         | 1          | 6   |
| miR-570-3p | <i>NTRK3</i>    | 1       | 1       | 1       | 1      | 0     | 1         | 1          | 6   |
| miR-570-3p | <i>ROR1</i>     | 1       | 1       | 1       | 1      | 0     | 1         | 1          | 6   |
| miR-570-3p | <i>NTS</i>      | 1       | 1       | 1       | 1      | 0     | 1         | 1          | 6   |
| miR-570-3p | <i>OAZ2</i>     | 1       | 1       | 1       | 1      | 0     | 1         | 1          | 6   |
| miR-570-3p | <i>OCRL</i>     | 1       | 1       | 1       | 1      | 0     | 1         | 1          | 6   |
| miR-570-3p | <i>ODF2</i>     | 1       | 1       | 1       | 1      | 0     | 1         | 1          | 6   |
| miR-570-3p | <i>OPA1</i>     | 1       | 1       | 1       | 1      | 0     | 1         | 1          | 6   |
| miR-570-3p | <i>OPCML</i>    | 1       | 1       | 1       | 1      | 0     | 1         | 1          | 6   |
| miR-570-3p | <i>OPHN1</i>    | 1       | 1       | 1       | 1      | 0     | 1         | 1          | 6   |
| miR-570-3p | <i>OSM</i>      | 1       | 1       | 1       | 1      | 0     | 1         | 1          | 6   |
| miR-570-3p | <i>FURIN</i>    | 1       | 1       | 1       | 1      | 0     | 1         | 1          | 6   |
| miR-570-3p | <i>PAFAH1B1</i> | 1       | 1       | 1       | 1      | 0     | 1         | 1          | 6   |
| miR-570-3p | <i>PAFAH1B2</i> | 1       | 1       | 1       | 1      | 0     | 1         | 1          | 6   |
| miR-570-3p | <i>PAFAH2</i>   | 1       | 1       | 1       | 1      | 0     | 1         | 1          | 6   |
| miR-570-3p | <i>PAK2</i>     | 1       | 1       | 1       | 1      | 0     | 1         | 1          | 6   |
| miR-570-3p | <i>PAM</i>      | 1       | 1       | 1       | 1      | 0     | 1         | 1          | 6   |
| miR-570-3p | <i>PAPPA</i>    | 1       | 1       | 1       | 1      | 0     | 1         | 1          | 6   |
| miR-570-3p | <i>PAX2</i>     | 1       | 1       | 1       | 1      | 0     | 1         | 1          | 6   |
| miR-570-3p | <i>PAX5</i>     | 1       | 1       | 1       | 1      | 0     | 1         | 1          | 6   |
| miR-570-3p | <i>PDCL</i>     | 1       | 1       | 1       | 1      | 0     | 1         | 1          | 6   |
| miR-570-3p | <i>PCCB</i>     | 1       | 1       | 1       | 1      | 0     | 1         | 1          | 6   |
| miR-570-3p | <i>PCSK5</i>    | 1       | 1       | 1       | 1      | 0     | 1         | 1          | 6   |
| miR-570-3p | <i>PDE1A</i>    | 1       | 1       | 1       | 1      | 0     | 1         | 1          | 6   |
| miR-570-3p | <i>PDE4B</i>    | 1       | 1       | 1       | 1      | 0     | 1         | 1          | 6   |
| miR-570-3p | <i>PDE4D</i>    | 1       | 1       | 1       | 1      | 0     | 1         | 1          | 6   |
| miR-570-3p | <i>PDE6A</i>    | 1       | 1       | 1       | 1      | 0     | 1         | 1          | 6   |
| miR-570-3p | <i>PDE9A</i>    | 1       | 1       | 1       | 1      | 0     | 1         | 1          | 6   |
| miR-570-3p | <i>PDHA1</i>    | 1       | 1       | 1       | 1      | 0     | 1         | 1          | 6   |
| miR-570-3p | <i>PDPK1</i>    | 1       | 1       | 1       | 1      | 0     | 1         | 1          | 6   |
| miR-570-3p | <i>CDK14</i>    | 1       | 1       | 1       | 1      | 0     | 1         | 1          | 6   |
| miR-570-3p | <i>PGGT1B</i>   | 1       | 1       | 1       | 1      | 0     | 1         | 1          | 6   |
| miR-570-3p | <i>PGM5</i>     | 1       | 1       | 1       | 1      | 0     | 1         | 1          | 6   |
| miR-570-3p | <i>PGR</i>      | 1       | 1       | 1       | 1      | 0     | 1         | 1          | 6   |
| miR-570-3p | <i>PHF2</i>     | 1       | 1       | 1       | 1      | 0     | 1         | 1          | 6   |
| miR-570-3p | <i>PIGA</i>     | 1       | 1       | 1       | 1      | 0     | 1         | 1          | 6   |

Table S1: Continued

| miRNA      | Gene           | miRWalk | Microt4 | miRanda | miRMap | RNA22 | RNAhybrid | Targetscan | SUM |
|------------|----------------|---------|---------|---------|--------|-------|-----------|------------|-----|
| miR-570-3p | <i>PIK3C2A</i> | 1       | 1       | 1       | 1      | 0     | 1         | 1          | 6   |
| miR-570-3p | <i>PITPNA</i>  | 1       | 1       | 1       | 1      | 0     | 1         | 1          | 6   |
| miR-570-3p | <i>PKNOX1</i>  | 1       | 1       | 1       | 1      | 0     | 1         | 1          | 6   |
| miR-570-3p | <i>PLAG1</i>   | 1       | 1       | 1       | 1      | 0     | 1         | 1          | 6   |
| miR-570-3p | <i>PLAGL2</i>  | 1       | 1       | 1       | 1      | 0     | 1         | 1          | 6   |
| miR-570-3p | <i>PLAT</i>    | 1       | 1       | 1       | 1      | 0     | 1         | 1          | 6   |
| miR-570-3p | <i>PLD1</i>    | 1       | 1       | 1       | 1      | 0     | 1         | 1          | 6   |
| miR-570-3p | <i>PLP1</i>    | 1       | 1       | 1       | 1      | 0     | 1         | 1          | 6   |
| miR-570-3p | <i>PLS1</i>    | 1       | 1       | 1       | 1      | 0     | 1         | 1          | 6   |
| miR-570-3p | <i>PRRX1</i>   | 1       | 1       | 1       | 1      | 0     | 1         | 1          | 6   |
| miR-570-3p | <i>PNN</i>     | 1       | 1       | 1       | 1      | 0     | 1         | 1          | 6   |
| miR-570-3p | <i>UBL3</i>    | 1       | 1       | 1       | 1      | 0     | 1         | 1          | 6   |
| miR-570-3p | <i>PODXL</i>   | 1       | 1       | 1       | 1      | 0     | 1         | 1          | 6   |
| miR-570-3p | <i>POR</i>     | 1       | 1       | 1       | 1      | 0     | 1         | 1          | 6   |
| miR-570-3p | <i>POU2F1</i>  | 1       | 1       | 1       | 1      | 0     | 1         | 1          | 6   |
| miR-570-3p | <i>PPEF2</i>   | 1       | 1       | 1       | 1      | 0     | 1         | 1          | 6   |
| miR-570-3p | <i>PPAT</i>    | 1       | 1       | 1       | 1      | 0     | 1         | 1          | 6   |
| miR-570-3p | <i>PPIA</i>    | 1       | 1       | 1       | 1      | 0     | 1         | 1          | 6   |
| miR-570-3p | <i>PPM1A</i>   | 1       | 1       | 1       | 1      | 0     | 1         | 1          | 6   |
| miR-570-3p | <i>PPM1B</i>   | 1       | 1       | 1       | 1      | 0     | 1         | 1          | 6   |
| miR-570-3p | <i>PPM1G</i>   | 1       | 1       | 1       | 1      | 0     | 1         | 1          | 6   |
| miR-570-3p | <i>PPP1CB</i>  | 1       | 1       | 1       | 1      | 0     | 1         | 1          | 6   |
| miR-570-3p | <i>PPP1R2</i>  | 1       | 1       | 1       | 1      | 0     | 1         | 1          | 6   |
| miR-570-3p | <i>PPP1R3D</i> | 1       | 1       | 1       | 1      | 0     | 1         | 1          | 6   |
| miR-570-3p | <i>PPP1R10</i> | 1       | 1       | 1       | 1      | 0     | 1         | 1          | 6   |
| miR-570-3p | <i>PPP2R5C</i> | 1       | 1       | 1       | 1      | 0     | 1         | 1          | 6   |
| miR-570-3p | <i>PPP3CA</i>  | 1       | 1       | 1       | 1      | 0     | 1         | 1          | 6   |
| miR-570-3p | <i>PPP3CB</i>  | 1       | 1       | 1       | 1      | 0     | 1         | 1          | 6   |
| miR-570-3p | <i>PRKAA1</i>  | 1       | 1       | 1       | 1      | 0     | 1         | 1          | 6   |
| miR-570-3p | <i>PKIA</i>    | 1       | 1       | 1       | 1      | 0     | 1         | 1          | 6   |
| miR-570-3p | <i>PKIB</i>    | 1       | 1       | 1       | 1      | 0     | 1         | 1          | 6   |
| miR-570-3p | <i>PRKAR2A</i> | 1       | 1       | 1       | 1      | 0     | 1         | 1          | 6   |
| miR-570-3p | <i>PRKCA</i>   | 1       | 1       | 1       | 1      | 0     | 1         | 1          | 6   |
| miR-570-3p | <i>PRKCB</i>   | 1       | 1       | 1       | 1      | 0     | 1         | 1          | 6   |
| miR-570-3p | <i>PRKG1</i>   | 1       | 1       | 1       | 1      | 0     | 1         | 1          | 6   |
| miR-570-3p | <i>MAPK9</i>   | 1       | 1       | 1       | 1      | 0     | 1         | 1          | 6   |
| miR-570-3p | <i>MAPK10</i>  | 1       | 1       | 1       | 1      | 0     | 1         | 1          | 6   |
| miR-570-3p | <i>MAPK10</i>  | 1       | 1       | 1       | 1      | 0     | 1         | 1          | 6   |
| miR-570-3p | <i>PRLR</i>    | 1       | 1       | 1       | 1      | 0     | 1         | 1          | 6   |
| miR-570-3p | <i>PROX1</i>   | 1       | 1       | 1       | 1      | 0     | 1         | 1          | 6   |

Table S1: Continued

| miRNA      | Gene            | miRWalk | Microt4 | miRanda | miRMap | RNA22 | RNAhybrid | Targetscan | SUM |
|------------|-----------------|---------|---------|---------|--------|-------|-----------|------------|-----|
| miR-570-3p | <i>PRRG1</i>    | 1       | 1       | 1       | 1      | 0     | 1         | 1          | 6   |
| miR-570-3p | <i>MASP1</i>    | 1       | 1       | 1       | 1      | 0     | 1         | 1          | 6   |
| miR-570-3p | <i>PSEN1</i>    | 1       | 1       | 1       | 1      | 0     | 1         | 1          | 6   |
| miR-570-3p | <i>PSMC6</i>    | 1       | 1       | 1       | 1      | 0     | 1         | 1          | 6   |
| miR-570-3p | <i>PSMD10</i>   | 1       | 1       | 1       | 1      | 0     | 1         | 1          | 6   |
| miR-570-3p | <i>PSMD11</i>   | 1       | 1       | 1       | 1      | 0     | 1         | 1          | 6   |
| miR-570-3p | <i>PTCH1</i>    | 1       | 1       | 1       | 1      | 0     | 1         | 1          | 6   |
| miR-570-3p | <i>PTGFRN</i>   | 1       | 1       | 1       | 1      | 0     | 1         | 1          | 6   |
| miR-570-3p | <i>PTGS2</i>    | 1       | 1       | 1       | 1      | 0     | 1         | 1          | 6   |
| miR-570-3p | <i>TWF1</i>     | 1       | 1       | 1       | 1      | 0     | 1         | 1          | 6   |
| miR-570-3p | <i>PTN</i>      | 1       | 1       | 1       | 1      | 0     | 1         | 1          | 6   |
| miR-570-3p | <i>PTPN4</i>    | 1       | 1       | 1       | 1      | 0     | 1         | 1          | 6   |
| miR-570-3p | <i>PTPN11</i>   | 1       | 1       | 1       | 1      | 0     | 1         | 1          | 6   |
| miR-570-3p | <i>PTPN14</i>   | 1       | 1       | 1       | 1      | 0     | 1         | 1          | 6   |
| miR-570-3p | <i>PTPRB</i>    | 1       | 1       | 1       | 1      | 0     | 1         | 1          | 6   |
| miR-570-3p | <i>PTPRD</i>    | 1       | 1       | 1       | 1      | 0     | 1         | 1          | 6   |
| miR-570-3p | <i>PTPRJ</i>    | 1       | 1       | 0       | 1      | 1     | 1         | 1          | 6   |
| miR-570-3p | <i>PTPRO</i>    | 1       | 1       | 1       | 1      | 0     | 1         | 1          | 6   |
| miR-570-3p | <i>PTPRZ1</i>   | 1       | 1       | 1       | 1      | 0     | 1         | 1          | 6   |
| miR-570-3p | <i>RAD1</i>     | 1       | 1       | 1       | 1      | 0     | 1         | 1          | 6   |
| miR-570-3p | <i>PURB</i>     | 1       | 1       | 1       | 1      | 0     | 1         | 1          | 6   |
| miR-570-3p | <i>PVRL1</i>    | 1       | 1       | 1       | 1      | 0     | 1         | 1          | 6   |
| miR-570-3p | <i>PXN</i>      | 1       | 1       | 1       | 1      | 0     | 1         | 1          | 6   |
| miR-570-3p | <i>QDPR</i>     | 1       | 1       | 1       | 1      | 0     | 1         | 1          | 6   |
| miR-570-3p | <i>RAB2A</i>    | 1       | 1       | 1       | 1      | 0     | 1         | 1          | 6   |
| miR-570-3p | <i>RAB3B</i>    | 1       | 1       | 1       | 1      | 0     | 1         | 1          | 6   |
| miR-570-3p | <i>RAB4A</i>    | 1       | 1       | 1       | 1      | 0     | 1         | 1          | 6   |
| miR-570-3p | <i>RAC1</i>     | 1       | 1       | 1       | 1      | 0     | 1         | 1          | 6   |
| miR-570-3p | <i>RAD23B</i>   | 1       | 1       | 1       | 1      | 0     | 1         | 1          | 6   |
| miR-570-3p | <i>RAF1</i>     | 1       | 1       | 1       | 1      | 0     | 1         | 1          | 6   |
| miR-570-3p | <i>RAG1</i>     | 1       | 1       | 1       | 1      | 0     | 1         | 1          | 6   |
| miR-570-3p | <i>RAP1GDS1</i> | 1       | 1       | 1       | 1      | 0     | 1         | 1          | 6   |
| miR-570-3p | <i>RASA2</i>    | 1       | 1       | 1       | 1      | 0     | 1         | 1          | 6   |
| miR-570-3p | <i>RBI</i>      | 1       | 1       | 1       | 1      | 0     | 1         | 1          | 6   |
| miR-570-3p | <i>RBBP4</i>    | 1       | 1       | 1       | 1      | 0     | 1         | 1          | 6   |
| miR-570-3p | <i>RBBP5</i>    | 1       | 1       | 1       | 1      | 0     | 1         | 1          | 6   |
| miR-570-3p | <i>RDX</i>      | 1       | 1       | 1       | 1      | 0     | 1         | 1          | 6   |
| miR-570-3p | <i>UPF1</i>     | 1       | 1       | 1       | 1      | 0     | 1         | 1          | 6   |
| miR-570-3p | <i>RFX1</i>     | 1       | 1       | 1       | 1      | 0     | 1         | 1          | 6   |
| miR-570-3p | <i>RGS16</i>    | 1       | 1       | 1       | 1      | 0     | 1         | 1          | 6   |

Table S1: Continued

| miRNA      | Gene           | miRWalk | Microt4 | miRanda | miRMap | RNA22 | RNAhybrid | Targetscan | SUM |
|------------|----------------|---------|---------|---------|--------|-------|-----------|------------|-----|
| miR-570-3p | <i>RHD</i>     | 1       | 1       | 1       | 1      | 0     | 1         | 1          | 6   |
| miR-570-3p | <i>BRD2</i>    | 1       | 1       | 1       | 1      | 0     | 1         | 1          | 6   |
| miR-570-3p | <i>ABCE1</i>   | 1       | 1       | 1       | 1      | 0     | 1         | 1          | 6   |
| miR-570-3p | <i>ROBO1</i>   | 1       | 1       | 1       | 1      | 0     | 1         | 1          | 6   |
| miR-570-3p | <i>ROBO2</i>   | 1       | 1       | 1       | 1      | 0     | 1         | 1          | 6   |
| miR-570-3p | <i>ROCK1</i>   | 1       | 1       | 1       | 0      | 1     | 1         | 1          | 6   |
| miR-570-3p | <i>RPS6KA2</i> | 1       | 1       | 1       | 1      | 0     | 1         | 1          | 6   |
| miR-570-3p | <i>RPS6KB1</i> | 1       | 1       | 1       | 1      | 0     | 1         | 1          | 6   |
| miR-570-3p | <i>CLIP1</i>   | 1       | 1       | 1       | 1      | 0     | 1         | 1          | 6   |
| miR-570-3p | <i>CLIP1</i>   | 1       | 1       | 1       | 1      | 0     | 1         | 1          | 6   |
| miR-570-3p | <i>RYR2</i>    | 1       | 1       | 1       | 1      | 0     | 1         | 1          | 6   |
| miR-570-3p | <i>SATB1</i>   | 1       | 1       | 1       | 1      | 0     | 1         | 1          | 6   |
| miR-570-3p | <i>ATXN1</i>   | 1       | 1       | 1       | 1      | 0     | 1         | 1          | 6   |
| miR-570-3p | <i>ATXN2</i>   | 1       | 1       | 1       | 1      | 0     | 1         | 1          | 6   |
| miR-570-3p | <i>SCN9A</i>   | 1       | 1       | 1       | 1      | 0     | 1         | 1          | 6   |
| miR-570-3p | <i>SDC2</i>    | 1       | 1       | 1       | 1      | 0     | 1         | 1          | 6   |
| miR-570-3p | <i>SEL1L</i>   | 1       | 1       | 1       | 1      | 0     | 1         | 1          | 6   |
| miR-570-3p | <i>SFRP1</i>   | 1       | 1       | 1       | 1      | 0     | 1         | 1          | 6   |
| miR-570-3p | <i>SFRP2</i>   | 1       | 1       | 1       | 1      | 0     | 1         | 1          | 6   |
| miR-570-3p | <i>SRSF2</i>   | 1       | 1       | 1       | 1      | 0     | 1         | 1          | 6   |
| miR-570-3p | <i>SRSF5</i>   | 1       | 1       | 1       | 1      | 0     | 1         | 1          | 6   |
| miR-570-3p | <i>SRSF6</i>   | 1       | 1       | 1       | 1      | 0     | 1         | 1          | 6   |
| miR-570-3p | <i>SGCD</i>    | 1       | 1       | 1       | 1      | 0     | 1         | 1          | 6   |
| miR-570-3p | <i>ST8SLA1</i> | 1       | 1       | 1       | 1      | 0     | 1         | 1          | 6   |
| miR-570-3p | <i>SIM1</i>    | 1       | 1       | 1       | 1      | 0     | 1         | 1          | 6   |
| miR-570-3p | <i>SKI</i>     | 1       | 1       | 1       | 1      | 0     | 1         | 1          | 6   |
| miR-570-3p | <i>SKIL</i>    | 1       | 1       | 1       | 1      | 0     | 1         | 1          | 6   |
| miR-570-3p | <i>SKP2</i>    | 1       | 1       | 1       | 1      | 0     | 1         | 1          | 6   |
| miR-570-3p | <i>SLA</i>     | 1       | 1       | 1       | 1      | 0     | 1         | 1          | 6   |
| miR-570-3p | <i>SLC1A2</i>  | 1       | 1       | 1       | 1      | 0     | 1         | 1          | 6   |
| miR-570-3p | <i>SLC1A4</i>  | 1       | 1       | 1       | 1      | 0     | 1         | 1          | 6   |
| miR-570-3p | <i>SLC5A3</i>  | 1       | 1       | 1       | 1      | 0     | 1         | 1          | 6   |
| miR-570-3p | <i>SLC6A6</i>  | 1       | 1       | 1       | 1      | 0     | 1         | 1          | 6   |
| miR-570-3p | <i>SLC8A1</i>  | 1       | 1       | 1       | 1      | 0     | 1         | 1          | 6   |
| miR-570-3p | <i>SLC8A3</i>  | 1       | 1       | 1       | 1      | 0     | 1         | 1          | 6   |
| miR-570-3p | <i>SLC18A2</i> | 1       | 1       | 1       | 1      | 0     | 1         | 1          | 6   |
| miR-570-3p | <i>SLC22A5</i> | 1       | 1       | 1       | 1      | 0     | 1         | 1          | 6   |
| miR-570-3p | <i>SIGLEC1</i> | 1       | 1       | 1       | 1      | 0     | 1         | 1          | 6   |
| miR-570-3p | <i>SORL1</i>   | 1       | 1       | 1       | 1      | 0     | 1         | 1          | 6   |
| miR-570-3p | <i>SOS1</i>    | 1       | 1       | 1       | 1      | 0     | 1         | 1          | 6   |

Table S1: Continued

| miRNA      | Gene          | miRWalk | Microt4 | miRanda | miRMap | RNA22 | RNAhybrid | Targetscan | SUM |
|------------|---------------|---------|---------|---------|--------|-------|-----------|------------|-----|
| miR-570-3p | <i>SOX1</i>   | 1       | 1       | 1       | 1      | 0     | 1         | 1          | 6   |
| miR-570-3p | <i>SOX3</i>   | 1       | 1       | 1       | 1      | 0     | 1         | 1          | 6   |
| miR-570-3p | <i>SOX5</i>   | 1       | 1       | 1       | 1      | 0     | 1         | 1          | 6   |
| miR-570-3p | <i>SOX9</i>   | 1       | 1       | 1       | 1      | 0     | 1         | 1          | 6   |
| miR-570-3p | <i>SP1</i>    | 1       | 1       | 1       | 1      | 0     | 1         | 1          | 6   |
| miR-570-3p | <i>SP3</i>    | 1       | 1       | 1       | 1      | 0     | 1         | 1          | 6   |
| miR-570-3p | <i>SP4</i>    | 1       | 1       | 1       | 1      | 0     | 1         | 1          | 6   |
| miR-570-3p | <i>SPAG1</i>  | 1       | 1       | 1       | 1      | 0     | 1         | 1          | 6   |
| miR-570-3p | <i>SPTAN1</i> | 1       | 1       | 1       | 1      | 0     | 1         | 1          | 6   |
| miR-570-3p | <i>SRP9</i>   | 1       | 1       | 1       | 1      | 0     | 1         | 1          | 6   |
| miR-570-3p | <i>SRP14</i>  | 1       | 1       | 1       | 1      | 0     | 1         | 1          | 6   |
| miR-570-3p | <i>SRP54</i>  | 1       | 1       | 1       | 1      | 0     | 1         | 1          | 6   |
| miR-570-3p | <i>SSTR3</i>  | 1       | 1       | 1       | 1      | 0     | 1         | 1          | 6   |
| miR-570-3p | <i>HSPA13</i> | 1       | 1       | 1       | 1      | 0     | 1         | 1          | 6   |
| miR-570-3p | <i>STRN</i>   | 1       | 1       | 1       | 1      | 0     | 1         | 1          | 6   |
| miR-570-3p | <i>STX3</i>   | 1       | 1       | 1       | 1      | 0     | 1         | 1          | 6   |
| miR-570-3p | <i>MED22</i>  | 1       | 1       | 1       | 1      | 0     | 1         | 1          | 6   |
| miR-570-3p | <i>VAMP1</i>  | 1       | 1       | 1       | 1      | 0     | 1         | 1          | 6   |
| miR-570-3p | <i>SYK</i>    | 1       | 1       | 1       | 1      | 0     | 1         | 1          | 6   |
| miR-570-3p | <i>SYT1</i>   | 1       | 1       | 1       | 1      | 0     | 1         | 1          | 6   |
| miR-570-3p | <i>TAC1</i>   | 1       | 1       | 1       | 1      | 0     | 1         | 1          | 6   |
| miR-570-3p | <i>TAF4B</i>  | 1       | 1       | 1       | 1      | 0     | 1         | 1          | 6   |
| miR-570-3p | <i>TAF11</i>  | 1       | 1       | 1       | 1      | 0     | 1         | 1          | 6   |
| miR-570-3p | <i>TBCA</i>   | 1       | 1       | 1       | 1      | 0     | 1         | 1          | 6   |
| miR-570-3p | <i>TBCC</i>   | 0       | 1       | 1       | 1      | 1     | 1         | 1          | 6   |
| miR-570-3p | <i>TCF4</i>   | 1       | 1       | 1       | 1      | 0     | 1         | 1          | 6   |
| miR-570-3p | <i>TBX3</i>   | 1       | 1       | 1       | 1      | 0     | 1         | 1          | 6   |
| miR-570-3p | <i>HNF1B</i>  | 1       | 1       | 1       | 1      | 0     | 1         | 1          | 6   |
| miR-570-3p | <i>TCF7L2</i> | 1       | 1       | 1       | 1      | 0     | 1         | 1          | 6   |
| miR-570-3p | <i>TCF7L2</i> | 1       | 1       | 1       | 1      | 0     | 1         | 1          | 6   |
| miR-570-3p | <i>TCF20</i>  | 1       | 1       | 1       | 1      | 0     | 1         | 1          | 6   |
| miR-570-3p | <i>TCF21</i>  | 1       | 1       | 1       | 1      | 0     | 1         | 1          | 6   |
| miR-570-3p | <i>TCTA</i>   | 1       | 1       | 1       | 1      | 0     | 1         | 1          | 6   |
| miR-570-3p | <i>TEAD1</i>  | 1       | 1       | 1       | 1      | 0     | 1         | 1          | 6   |
| miR-570-3p | <i>TERF2</i>  | 1       | 1       | 1       | 1      | 0     | 1         | 1          | 6   |
| miR-570-3p | <i>TFAM</i>   | 1       | 1       | 1       | 1      | 0     | 1         | 1          | 6   |
| miR-570-3p | <i>TFAP2B</i> | 1       | 1       | 1       | 1      | 0     | 1         | 1          | 6   |
| miR-570-3p | <i>TFDP1</i>  | 1       | 1       | 1       | 1      | 0     | 1         | 1          | 6   |
| miR-570-3p | <i>TFRC</i>   | 1       | 1       | 1       | 1      | 0     | 1         | 1          | 6   |
| miR-570-3p | <i>TGFA</i>   | 1       | 1       | 1       | 1      | 0     | 1         | 1          | 6   |

Table S1: Continued

| miRNA      | Gene           | miRWalk | Microt4 | miRanda | miRMap | RNA22 | RNAhybrid | Targetscan | SUM |
|------------|----------------|---------|---------|---------|--------|-------|-----------|------------|-----|
| miR-570-3p | <i>TGFA</i>    | 1       | 1       | 1       | 1      | 0     | 1         | 1          | 6   |
| miR-570-3p | <i>TGFBRI</i>  | 1       | 1       | 1       | 1      | 0     | 1         | 1          | 6   |
| miR-570-3p | <i>THBD</i>    | 1       | 1       | 1       | 1      | 0     | 1         | 1          | 6   |
| miR-570-3p | <i>THRB</i>    | 1       | 1       | 1       | 1      | 0     | 1         | 1          | 6   |
| miR-570-3p | <i>KLF10</i>   | 1       | 1       | 1       | 1      | 0     | 1         | 1          | 6   |
| miR-570-3p | <i>TIA1</i>    | 1       | 1       | 1       | 1      | 0     | 1         | 1          | 6   |
| miR-570-3p | <i>TIMP2</i>   | 1       | 1       | 1       | 1      | 0     | 1         | 1          | 6   |
| miR-570-3p | <i>TIMP3</i>   | 1       | 1       | 1       | 1      | 0     | 1         | 1          | 6   |
| miR-570-3p | <i>TIMP4</i>   | 1       | 1       | 1       | 1      | 0     | 1         | 1          | 6   |
| miR-570-3p | <i>TNF</i>     | 1       | 1       | 1       | 1      | 0     | 1         | 1          | 6   |
| miR-570-3p | <i>TNFAIP3</i> | 1       | 1       | 1       | 1      | 0     | 1         | 1          | 6   |
| miR-570-3p | <i>TOP2A</i>   | 1       | 1       | 1       | 1      | 0     | 1         | 1          | 6   |
| miR-570-3p | <i>TPM3</i>    | 1       | 1       | 1       | 1      | 0     | 1         | 1          | 6   |
| miR-570-3p | <i>TPP2</i>    | 1       | 1       | 1       | 1      | 0     | 1         | 1          | 6   |
| miR-570-3p | <i>TRAF3</i>   | 1       | 1       | 1       | 1      | 0     | 1         | 1          | 6   |
| miR-570-3p | <i>TTK</i>     | 1       | 1       | 1       | 1      | 0     | 1         | 1          | 6   |
| miR-570-3p | <i>TTR</i>     | 1       | 1       | 1       | 1      | 0     | 1         | 1          | 6   |
| miR-570-3p | <i>TUFT1</i>   | 1       | 1       | 1       | 1      | 0     | 1         | 1          | 6   |
| miR-570-3p | <i>UBE2E1</i>  | 1       | 1       | 1       | 1      | 0     | 1         | 1          | 6   |
| miR-570-3p | <i>UBE2H</i>   | 1       | 1       | 1       | 1      | 0     | 1         | 1          | 6   |
| miR-570-3p | <i>SUMO1</i>   | 1       | 1       | 1       | 1      | 0     | 1         | 1          | 6   |
| miR-570-3p | <i>UBTF</i>    | 1       | 1       | 1       | 1      | 0     | 1         | 1          | 6   |
| miR-570-3p | <i>UGT8</i>    | 1       | 1       | 1       | 1      | 0     | 1         | 1          | 6   |
| miR-570-3p | <i>UTRN</i>    | 1       | 1       | 1       | 1      | 0     | 1         | 1          | 6   |
| miR-570-3p | <i>KDM6A</i>   | 1       | 1       | 1       | 1      | 0     | 1         | 1          | 6   |
| miR-570-3p | <i>EIF4H</i>   | 1       | 1       | 1       | 1      | 0     | 1         | 1          | 6   |
| miR-570-3p | <i>WEE1</i>    | 1       | 1       | 1       | 1      | 0     | 1         | 1          | 6   |
| miR-570-3p | <i>WNT7B</i>   | 1       | 1       | 1       | 1      | 0     | 1         | 1          | 6   |
| miR-570-3p | <i>WRN</i>     | 1       | 1       | 1       | 1      | 0     | 1         | 1          | 6   |
| miR-570-3p | <i>XPO1</i>    | 1       | 1       | 1       | 1      | 0     | 1         | 1          | 6   |
| miR-570-3p | <i>XRCC4</i>   | 1       | 1       | 1       | 1      | 0     | 1         | 1          | 6   |
| miR-570-3p | <i>YES1</i>    | 1       | 1       | 1       | 1      | 0     | 1         | 1          | 6   |
| miR-570-3p | <i>YWHAG</i>   | 1       | 1       | 1       | 1      | 0     | 1         | 1          | 6   |
| miR-570-3p | <i>YWHAZ</i>   | 1       | 1       | 1       | 1      | 0     | 1         | 1          | 6   |
| miR-570-3p | <i>ZFX</i>     | 1       | 1       | 1       | 1      | 0     | 1         | 1          | 6   |
| miR-570-3p | <i>ZFY</i>     | 1       | 1       | 1       | 1      | 0     | 1         | 1          | 6   |
| miR-570-3p | <i>ZIC1</i>    | 1       | 1       | 1       | 1      | 0     | 1         | 1          | 6   |
| miR-570-3p | <i>ZIC3</i>    | 1       | 1       | 1       | 1      | 0     | 1         | 1          | 6   |
| miR-570-3p | <i>ZNF3</i>    | 1       | 1       | 1       | 1      | 0     | 1         | 1          | 6   |
| miR-570-3p | <i>ZNF12</i>   | 1       | 1       | 1       | 1      | 0     | 1         | 1          | 6   |



Table S1: Continued

| miRNA      | Gene            | miRWalk | Microt4 | miRanda | miRMap | RNA22 | RNAhybrid | Targetscan | SUM |
|------------|-----------------|---------|---------|---------|--------|-------|-----------|------------|-----|
| miR-570-3p | <i>ZNF22</i>    | 1       | 1       | 1       | 1      | 0     | 1         | 1          | 6   |
| miR-570-3p | <i>ZNF24</i>    | 1       | 1       | 1       | 1      | 0     | 1         | 1          | 6   |
| miR-570-3p | <i>ZNF35</i>    | 1       | 1       | 1       | 1      | 0     | 1         | 1          | 6   |
| miR-570-3p | <i>ZNF74</i>    | 1       | 1       | 1       | 1      | 0     | 1         | 1          | 6   |
| miR-570-3p | <i>ZNF84</i>    | 1       | 1       | 1       | 1      | 0     | 1         | 1          | 6   |
| miR-570-3p | <i>ZNF148</i>   | 1       | 1       | 1       | 1      | 0     | 1         | 1          | 6   |
| miR-570-3p | <i>ZSCAN9</i>   | 1       | 1       | 1       | 1      | 0     | 1         | 1          | 6   |
| miR-570-3p | <i>ZFAND5</i>   | 1       | 1       | 1       | 1      | 0     | 1         | 1          | 6   |
| miR-570-3p | <i>ZXDA</i>     | 1       | 1       | 1       | 1      | 0     | 1         | 1          | 6   |
| miR-570-3p | <i>ST8SLA4</i>  | 1       | 1       | 1       | 1      | 0     | 1         | 1          | 6   |
| miR-570-3p | <i>MAFK</i>     | 1       | 1       | 1       | 1      | 0     | 1         | 1          | 6   |
| miR-570-3p | <i>FZD3</i>     | 1       | 1       | 1       | 1      | 0     | 1         | 1          | 6   |
| miR-570-3p | <i>TUSC3</i>    | 1       | 1       | 1       | 1      | 0     | 1         | 1          | 6   |
| miR-570-3p | <i>BRD3</i>     | 1       | 1       | 1       | 1      | 0     | 1         | 1          | 6   |
| miR-570-3p | <i>NCOA4</i>    | 1       | 1       | 1       | 1      | 0     | 1         | 1          | 6   |
| miR-570-3p | <i>PTP4A2</i>   | 1       | 1       | 1       | 1      | 0     | 1         | 1          | 6   |
| miR-570-3p | <i>KMT2D</i>    | 1       | 1       | 1       | 1      | 0     | 1         | 1          | 6   |
| miR-570-3p | <i>FXR1</i>     | 1       | 1       | 1       | 1      | 0     | 1         | 1          | 6   |
| miR-570-3p | <i>HMGGA2</i>   | 1       | 1       | 1       | 1      | 0     | 1         | 1          | 6   |
| miR-570-3p | <i>RND2</i>     | 1       | 1       | 1       | 1      | 0     | 1         | 1          | 6   |
| miR-570-3p | <i>NCOA3</i>    | 1       | 1       | 1       | 1      | 0     | 1         | 1          | 6   |
| miR-570-3p | <i>DGCR14</i>   | 1       | 1       | 1       | 1      | 0     | 1         | 1          | 6   |
| miR-570-3p | <i>FZD7</i>     | 1       | 1       | 1       | 1      | 0     | 1         | 1          | 6   |
| miR-570-3p | <i>NSMAF</i>    | 1       | 1       | 1       | 1      | 0     | 1         | 1          | 6   |
| miR-570-3p | <i>CUL3</i>     | 1       | 1       | 1       | 1      | 0     | 1         | 1          | 6   |
| miR-570-3p | <i>CUL2</i>     | 1       | 1       | 1       | 1      | 0     | 1         | 1          | 6   |
| miR-570-3p | <i>ATRN</i>     | 1       | 1       | 1       | 1      | 0     | 1         | 1          | 6   |
| miR-570-3p | <i>SMARCA5</i>  | 1       | 1       | 1       | 1      | 0     | 1         | 1          | 6   |
| miR-570-3p | <i>FKBP6</i>    | 1       | 1       | 1       | 1      | 0     | 1         | 1          | 6   |
| miR-570-3p | <i>CDC42BPA</i> | 1       | 1       | 1       | 1      | 0     | 1         | 1          | 6   |
| miR-570-3p | <i>MAP4K3</i>   | 1       | 1       | 1       | 1      | 0     | 1         | 1          | 6   |
| miR-570-3p | <i>GCM1</i>     | 1       | 1       | 1       | 1      | 0     | 1         | 1          | 6   |
| miR-570-3p | <i>GAS7</i>     | 1       | 1       | 1       | 1      | 0     | 1         | 1          | 6   |
| miR-570-3p | <i>DGKE</i>     | 1       | 1       | 1       | 1      | 0     | 1         | 1          | 6   |
| miR-570-3p | <i>AGPS</i>     | 1       | 1       | 1       | 1      | 0     | 1         | 1          | 6   |
| miR-570-3p | <i>CGGBP1</i>   | 1       | 1       | 1       | 1      | 0     | 1         | 1          | 6   |
| miR-570-3p | <i>BHLHE40</i>  | 1       | 1       | 1       | 1      | 0     | 1         | 1          | 6   |
| miR-570-3p | <i>PDLIM4</i>   | 1       | 1       | 1       | 1      | 0     | 1         | 1          | 6   |
| miR-570-3p | <i>TNFSF11</i>  | 1       | 1       | 1       | 1      | 0     | 1         | 1          | 6   |
| miR-570-3p | <i>STC2</i>     | 1       | 1       | 1       | 1      | 0     | 1         | 1          | 6   |

Table S1: Continued

| miRNA      | Gene             | miRWalk | Microt4 | miRanda | miRMap | RNA22 | RNAhybrid | Targetscan | SUM |
|------------|------------------|---------|---------|---------|--------|-------|-----------|------------|-----|
| miR-570-3p | <i>PDE8B</i>     | 1       | 1       | 1       | 1      | 0     | 1         | 1          | 6   |
| miR-570-3p | <i>TP63</i>      | 1       | 1       | 1       | 1      | 0     | 1         | 1          | 6   |
| miR-570-3p | <i>PDE5A</i>     | 1       | 1       | 1       | 1      | 0     | 1         | 1          | 6   |
| miR-570-3p | <i>IRS2</i>      | 1       | 1       | 1       | 1      | 0     | 1         | 1          | 6   |
| miR-570-3p | <i>SLC4A4</i>    | 1       | 1       | 1       | 1      | 0     | 1         | 1          | 6   |
| miR-570-3p | <i>VAMP4</i>     | 1       | 1       | 1       | 1      | 0     | 1         | 1          | 6   |
| miR-570-3p | <i>PEA15</i>     | 1       | 1       | 1       | 1      | 0     | 1         | 1          | 6   |
| miR-570-3p | <i>JRKL</i>      | 1       | 1       | 1       | 1      | 0     | 1         | 1          | 6   |
| miR-570-3p | <i>B4GALT2</i>   | 1       | 1       | 1       | 1      | 0     | 1         | 1          | 6   |
| miR-570-3p | <i>ABCC3</i>     | 1       | 1       | 1       | 1      | 0     | 1         | 1          | 6   |
| miR-570-3p | <i>NOL4</i>      | 1       | 1       | 1       | 1      | 0     | 1         | 1          | 6   |
| miR-570-3p | <i>SNX4</i>      | 1       | 1       | 1       | 1      | 0     | 1         | 1          | 6   |
| miR-570-3p | <i>SNX3</i>      | 1       | 1       | 1       | 1      | 0     | 1         | 1          | 6   |
| miR-570-3p | <i>ADAM19</i>    | 1       | 1       | 1       | 1      | 0     | 1         | 1          | 6   |
| miR-570-3p | <i>CDS2</i>      | 1       | 1       | 1       | 1      | 0     | 1         | 1          | 6   |
| miR-570-3p | <i>CD164</i>     | 1       | 1       | 1       | 1      | 0     | 1         | 1          | 6   |
| miR-570-3p | <i>SNAP23</i>    | 1       | 1       | 1       | 1      | 0     | 1         | 1          | 6   |
| miR-570-3p | <i>RIOK3</i>     | 1       | 1       | 1       | 1      | 0     | 1         | 1          | 6   |
| miR-570-3p | <i>TNFRSF11A</i> | 1       | 1       | 1       | 1      | 0     | 1         | 1          | 6   |
| miR-570-3p | <i>TRIM24</i>    | 1       | 1       | 1       | 1      | 0     | 1         | 1          | 6   |
| miR-570-3p | <i>DCAF5</i>     | 0       | 1       | 1       | 1      | 1     | 1         | 1          | 6   |
| miR-570-3p | <i>CD84</i>      | 1       | 1       | 1       | 1      | 0     | 1         | 1          | 6   |
| miR-570-3p | <i>ALKBH1</i>    | 1       | 1       | 1       | 1      | 0     | 1         | 1          | 6   |
| miR-570-3p | <i>ASAP2</i>     | 1       | 1       | 1       | 1      | 0     | 1         | 1          | 6   |
| miR-570-3p | <i>PER2</i>      | 1       | 1       | 1       | 1      | 0     | 1         | 1          | 6   |
| miR-570-3p | <i>EIF2S2</i>    | 1       | 1       | 1       | 1      | 0     | 1         | 1          | 6   |
| miR-570-3p | <i>CPNE3</i>     | 1       | 1       | 1       | 1      | 0     | 1         | 1          | 6   |
| miR-570-3p | <i>PRPF4B</i>    | 1       | 1       | 1       | 1      | 0     | 1         | 1          | 6   |
| miR-570-3p | <i>MPZL1</i>     | 1       | 1       | 1       | 1      | 0     | 1         | 1          | 6   |
| miR-570-3p | <i>SEMA5A</i>    | 1       | 1       | 1       | 1      | 0     | 1         | 1          | 6   |
| miR-570-3p | <i>MAP7</i>      | 1       | 1       | 1       | 1      | 0     | 1         | 1          | 6   |
| miR-570-3p | <i>SLC7A6</i>    | 1       | 1       | 1       | 1      | 0     | 1         | 1          | 6   |
| miR-570-3p | <i>CLDN8</i>     | 1       | 1       | 1       | 1      | 0     | 1         | 1          | 6   |
| miR-570-3p | <i>MTMR4</i>     | 1       | 1       | 1       | 1      | 0     | 1         | 1          | 6   |
| miR-570-3p | <i>SEC22C</i>    | 1       | 1       | 1       | 1      | 0     | 1         | 1          | 6   |
| miR-570-3p | <i>RABEP1</i>    | 1       | 1       | 1       | 1      | 0     | 1         | 1          | 6   |
| miR-570-3p | <i>OSMR</i>      | 1       | 1       | 1       | 1      | 0     | 1         | 1          | 6   |
| miR-570-3p | <i>ZMYM6</i>     | 1       | 1       | 1       | 1      | 0     | 1         | 1          | 6   |
| miR-570-3p | <i>XPR1</i>      | 1       | 1       | 1       | 1      | 0     | 1         | 1          | 6   |
| miR-570-3p | <i>VAPB</i>      | 1       | 1       | 1       | 1      | 0     | 1         | 1          | 6   |

Table S1: Continued

| miRNA      | Gene            | miRWalk | Microt4 | miRanda | miRMap | RNA22 | RNAhybrid | Targetscan | SUM |
|------------|-----------------|---------|---------|---------|--------|-------|-----------|------------|-----|
| miR-570-3p | <i>MTA2</i>     | 1       | 1       | 1       | 1      | 0     | 1         | 1          | 6   |
| miR-570-3p | <i>DLGAP2</i>   | 1       | 1       | 1       | 1      | 0     | 1         | 1          | 6   |
| miR-570-3p | <i>DLG5</i>     | 1       | 1       | 1       | 1      | 0     | 1         | 1          | 6   |
| miR-570-3p | <i>SRSF11</i>   | 0       | 1       | 1       | 1      | 1     | 1         | 1          | 6   |
| miR-570-3p | <i>SOCS6</i>    | 1       | 1       | 1       | 1      | 0     | 1         | 1          | 6   |
| miR-570-3p | <i>PPIG</i>     | 1       | 1       | 1       | 1      | 0     | 1         | 1          | 6   |
| miR-570-3p | <i>RASAL2</i>   | 1       | 1       | 1       | 1      | 0     | 1         | 1          | 6   |
| miR-570-3p | <i>AKAP7</i>    | 1       | 1       | 1       | 1      | 0     | 1         | 1          | 6   |
| miR-570-3p | <i>PSMF1</i>    | 1       | 1       | 1       | 1      | 0     | 1         | 1          | 6   |
| miR-570-3p | <i>SLC4A7</i>   | 1       | 1       | 1       | 1      | 0     | 1         | 1          | 6   |
| miR-570-3p | <i>STXBP5L</i>  | 1       | 1       | 1       | 1      | 0     | 1         | 1          | 6   |
| miR-570-3p | <i>IGDCC3</i>   | 1       | 1       | 1       | 1      | 0     | 1         | 1          | 6   |
| miR-570-3p | <i>SOX13</i>    | 1       | 1       | 1       | 1      | 0     | 1         | 1          | 6   |
| miR-570-3p | <i>PDIA4</i>    | 1       | 1       | 1       | 1      | 0     | 1         | 1          | 6   |
| miR-570-3p | <i>AATK</i>     | 1       | 1       | 1       | 1      | 0     | 1         | 1          | 6   |
| miR-570-3p | <i>SH3PXD2A</i> | 0       | 1       | 1       | 1      | 1     | 1         | 1          | 6   |
| miR-570-3p | <i>MTFR1</i>    | 1       | 1       | 1       | 1      | 0     | 1         | 1          | 6   |
| miR-570-3p | <i>ZNF516</i>   | 1       | 1       | 1       | 1      | 0     | 1         | 1          | 6   |
| miR-570-3p | <i>EIF5B</i>    | 1       | 1       | 1       | 1      | 0     | 1         | 1          | 6   |
| miR-570-3p | <i>FAM53B</i>   | 1       | 1       | 1       | 1      | 0     | 1         | 1          | 6   |
| miR-570-3p | <i>N4BP1</i>    | 1       | 1       | 1       | 1      | 0     | 1         | 1          | 6   |
| miR-570-3p | <i>FAM131B</i>  | 1       | 1       | 1       | 1      | 0     | 1         | 1          | 6   |
| miR-570-3p | <i>PHF16</i>    | 0       | 1       | 1       | 1      | 1     | 1         | 1          | 6   |
| miR-570-3p | <i>KIAA0232</i> | 1       | 1       | 1       | 1      | 0     | 1         | 1          | 6   |
| miR-570-3p | <i>TBC1D5</i>   | 1       | 1       | 1       | 1      | 0     | 1         | 1          | 6   |
| miR-570-3p | <i>RIMS3</i>    | 1       | 1       | 1       | 1      | 0     | 1         | 1          | 6   |
| miR-570-3p | <i>SERTAD2</i>  | 1       | 1       | 1       | 1      | 0     | 1         | 1          | 6   |
| miR-570-3p | <i>DAZAP2</i>   | 0       | 1       | 1       | 1      | 1     | 1         | 1          | 6   |
| miR-570-3p | <i>KIAA0141</i> | 1       | 1       | 1       | 1      | 0     | 1         | 1          | 6   |
| miR-570-3p | <i>EFCAB14</i>  | 1       | 1       | 1       | 1      | 0     | 1         | 1          | 6   |
| miR-570-3p | <i>GIT2</i>     | 0       | 1       | 1       | 1      | 1     | 1         | 1          | 6   |
| miR-570-3p | <i>GINS1</i>    | 1       | 1       | 1       | 1      | 0     | 1         | 1          | 6   |
| miR-570-3p | <i>TLK1</i>     | 1       | 1       | 1       | 1      | 0     | 1         | 1          | 6   |
| miR-570-3p | <i>SMG7</i>     | 1       | 1       | 1       | 1      | 0     | 1         | 1          | 6   |
| miR-570-3p | <i>TECPR2</i>   | 1       | 1       | 1       | 1      | 0     | 1         | 1          | 6   |
| miR-570-3p | <i>RABGAP1L</i> | 0       | 1       | 1       | 1      | 1     | 1         | 1          | 6   |
| miR-570-3p | <i>HELZ</i>     | 1       | 1       | 1       | 1      | 0     | 1         | 1          | 6   |
| miR-570-3p | <i>MAFB</i>     | 0       | 1       | 1       | 1      | 1     | 1         | 1          | 6   |
| miR-570-3p | <i>RBM8A</i>    | 1       | 1       | 1       | 1      | 0     | 1         | 1          | 6   |
| miR-570-3p | <i>THRAP3</i>   | 1       | 1       | 1       | 1      | 0     | 1         | 1          | 6   |

Table S1: Continued

| miRNA      | Gene           | miRWalk | Microt4 | miRanda | miRMap | RNA22 | RNAhybrid | Targetscan | SUM |
|------------|----------------|---------|---------|---------|--------|-------|-----------|------------|-----|
| miR-570-3p | <i>HNRNPDL</i> | 1       | 1       | 1       | 1      | 0     | 1         | 1          | 6   |
| miR-570-3p | <i>ABII</i>    | 1       | 1       | 1       | 1      | 0     | 1         | 1          | 6   |
| miR-570-3p | <i>ZBTB33</i>  | 1       | 1       | 1       | 1      | 0     | 1         | 1          | 6   |
| miR-570-3p | <i>ABCC5</i>   | 1       | 1       | 1       | 1      | 0     | 1         | 1          | 6   |
| miR-570-3p | <i>RBM12</i>   | 1       | 1       | 1       | 1      | 0     | 1         | 1          | 6   |
| miR-570-3p | <i>FAM13A</i>  | 1       | 1       | 1       | 1      | 0     | 1         | 1          | 6   |
| miR-570-3p | <i>ABI2</i>    | 1       | 1       | 1       | 1      | 0     | 1         | 1          | 6   |
| miR-570-3p | <i>WASF2</i>   | 0       | 1       | 1       | 1      | 1     | 1         | 1          | 6   |
| miR-570-3p | <i>CNIH1</i>   | 1       | 1       | 1       | 1      | 0     | 1         | 1          | 6   |
| miR-570-3p | <i>LHFPL2</i>  | 1       | 1       | 1       | 1      | 0     | 1         | 1          | 6   |
| miR-570-3p | <i>AP3S2</i>   | 1       | 1       | 1       | 1      | 0     | 1         | 1          | 6   |
| miR-570-3p | <i>KCNMB2</i>  | 1       | 1       | 1       | 1      | 0     | 1         | 1          | 6   |
| miR-570-3p | <i>SPRY3</i>   | 1       | 1       | 1       | 1      | 0     | 1         | 1          | 6   |
| miR-570-3p | <i>SPRY1</i>   | 1       | 1       | 1       | 1      | 0     | 1         | 1          | 6   |
| miR-570-3p | <i>SPRY2</i>   | 1       | 1       | 1       | 1      | 0     | 1         | 1          | 6   |
| miR-570-3p | <i>STAM2</i>   | 1       | 1       | 1       | 1      | 0     | 1         | 1          | 6   |
| miR-570-3p | <i>Mar-06</i>  | 1       | 1       | 1       | 1      | 0     | 1         | 1          | 6   |
| miR-570-3p | <i>RTN3</i>    | 0       | 1       | 1       | 1      | 1     | 1         | 1          | 6   |
| miR-570-3p | <i>PCGF3</i>   | 1       | 1       | 1       | 1      | 0     | 1         | 1          | 6   |
| miR-570-3p | <i>TUBB4B</i>  | 1       | 1       | 1       | 1      | 0     | 1         | 1          | 6   |
| miR-570-3p | <i>CORO2B</i>  | 1       | 1       | 1       | 1      | 0     | 1         | 1          | 6   |
| miR-570-3p | <i>ATP8A1</i>  | 1       | 1       | 1       | 1      | 0     | 1         | 1          | 6   |
| miR-570-3p | <i>ATP8A1</i>  | 1       | 1       | 1       | 1      | 0     | 1         | 1          | 6   |
| miR-570-3p | <i>ARIH2</i>   | 1       | 1       | 1       | 1      | 0     | 1         | 1          | 6   |
| miR-570-3p | <i>ZBTB18</i>  | 1       | 1       | 1       | 1      | 0     | 1         | 1          | 6   |
| miR-570-3p | <i>SLC9A6</i>  | 0       | 1       | 1       | 1      | 1     | 1         | 1          | 6   |
| miR-570-3p | <i>SEC23A</i>  | 0       | 1       | 1       | 1      | 1     | 1         | 1          | 6   |
| miR-570-3p | <i>NCOA2</i>   | 1       | 1       | 1       | 1      | 0     | 1         | 1          | 6   |
| miR-570-3p | <i>DDX17</i>   | 1       | 1       | 1       | 1      | 0     | 1         | 1          | 6   |
| miR-570-3p | <i>ARL6IP5</i> | 1       | 1       | 1       | 1      | 0     | 1         | 1          | 6   |
| miR-570-3p | <i>ARFGEF2</i> | 0       | 1       | 1       | 1      | 1     | 1         | 1          | 6   |
| miR-570-3p | <i>SMC2</i>    | 1       | 1       | 1       | 1      | 0     | 1         | 1          | 6   |
| miR-570-3p | <i>PDLIM5</i>  | 1       | 1       | 1       | 1      | 0     | 1         | 1          | 6   |
| miR-570-3p | <i>HEXIM1</i>  | 1       | 1       | 1       | 1      | 0     | 1         | 1          | 6   |
| miR-570-3p | <i>STAMBP</i>  | 1       | 1       | 1       | 1      | 0     | 1         | 1          | 6   |
| miR-570-3p | <i>CELF1</i>   | 1       | 1       | 1       | 1      | 0     | 1         | 1          | 6   |
| miR-570-3p | <i>CELF2</i>   | 1       | 1       | 1       | 1      | 0     | 1         | 1          | 6   |
| miR-570-3p | <i>NEAT5</i>   | 0       | 1       | 1       | 1      | 1     | 1         | 1          | 6   |
| miR-570-3p | <i>HBS1L</i>   | 1       | 1       | 1       | 1      | 0     | 1         | 1          | 6   |
| miR-570-3p | <i>FRS2</i>    | 1       | 1       | 1       | 1      | 0     | 1         | 1          | 6   |

Table S1: Continued

| miRNA      | Gene             | miRWalk | Microt4 | miRanda | miRMap | RNA22 | RNAhybrid | Targetscan | SUM |
|------------|------------------|---------|---------|---------|--------|-------|-----------|------------|-----|
| miR-570-3p | <i>SUB1</i>      | 1       | 1       | 1       | 1      | 0     | 1         | 1          | 6   |
| miR-570-3p | <i>SPIN1</i>     | 1       | 1       | 1       | 1      | 0     | 1         | 1          | 6   |
| miR-570-3p | <i>GCN1L1</i>    | 1       | 1       | 1       | 1      | 0     | 1         | 1          | 6   |
| miR-570-3p | <i>KIF2C</i>     | 1       | 1       | 1       | 1      | 0     | 1         | 1          | 6   |
| miR-570-3p | <i>NUDT21</i>    | 0       | 1       | 1       | 1      | 1     | 1         | 1          | 6   |
| miR-570-3p | <i>ABHD2</i>     | 1       | 1       | 1       | 1      | 0     | 1         | 1          | 6   |
| miR-570-3p | <i>RAPGEF4</i>   | 1       | 1       | 1       | 1      | 0     | 1         | 1          | 6   |
| miR-570-3p | <i>ADAMTSS5</i>  | 1       | 1       | 1       | 1      | 0     | 1         | 1          | 6   |
| miR-570-3p | <i>HNRNPUL1</i>  | 1       | 1       | 1       | 1      | 0     | 1         | 1          | 6   |
| miR-570-3p | <i>PTPRT</i>     | 1       | 1       | 1       | 1      | 0     | 1         | 1          | 6   |
| miR-570-3p | <i>ZWINT</i>     | 1       | 1       | 1       | 1      | 0     | 1         | 1          | 6   |
| miR-570-3p | <i>AP4S1</i>     | 1       | 1       | 1       | 1      | 0     | 1         | 1          | 6   |
| miR-570-3p | <i>MAP4K5</i>    | 0       | 1       | 1       | 1      | 1     | 1         | 1          | 6   |
| miR-570-3p | <i>AKAP13</i>    | 0       | 1       | 1       | 1      | 1     | 1         | 1          | 6   |
| miR-570-3p | <i>AKAP11</i>    | 1       | 1       | 1       | 1      | 0     | 1         | 1          | 6   |
| miR-570-3p | <i>SEC63</i>     | 1       | 1       | 1       | 1      | 0     | 1         | 1          | 6   |
| miR-570-3p | <i>KLF12</i>     | 1       | 1       | 1       | 1      | 0     | 1         | 1          | 6   |
| miR-570-3p | <i>KLF8</i>      | 1       | 1       | 1       | 1      | 0     | 1         | 1          | 6   |
| miR-570-3p | <i>MGAT4A</i>    | 1       | 1       | 1       | 1      | 0     | 1         | 1          | 6   |
| miR-570-3p | <i>DDX42</i>     | 1       | 1       | 1       | 1      | 0     | 1         | 1          | 6   |
| miR-570-3p | <i>RNF13</i>     | 1       | 1       | 1       | 1      | 0     | 1         | 1          | 6   |
| miR-570-3p | <i>RAB11FIP2</i> | 1       | 1       | 1       | 1      | 0     | 1         | 1          | 6   |
| miR-570-3p | <i>VASH1</i>     | 1       | 1       | 1       | 1      | 0     | 1         | 1          | 6   |
| miR-570-3p | <i>ADNP2</i>     | 1       | 1       | 1       | 1      | 0     | 1         | 1          | 6   |
| miR-570-3p | <i>CHSY1</i>     | 1       | 1       | 1       | 1      | 0     | 1         | 1          | 6   |
| miR-570-3p | <i>NLGN1</i>     | 1       | 1       | 1       | 1      | 0     | 1         | 1          | 6   |
| miR-570-3p | <i>ENPP4</i>     | 0       | 1       | 1       | 1      | 1     | 1         | 1          | 6   |
| miR-570-3p | <i>INPP5F</i>    | 1       | 1       | 1       | 1      | 0     | 1         | 1          | 6   |
| miR-570-3p | <i>FOXJ3</i>     | 1       | 1       | 1       | 1      | 0     | 1         | 1          | 6   |
| miR-570-3p | <i>ZNF365</i>    | 0       | 1       | 1       | 1      | 1     | 1         | 1          | 6   |
| miR-570-3p | <i>MAPRE1</i>    | 1       | 1       | 1       | 1      | 0     | 1         | 1          | 6   |
| miR-570-3p | <i>ATF6</i>      | 1       | 1       | 1       | 1      | 0     | 1         | 1          | 6   |
| miR-570-3p | <i>SEPHS1</i>    | 1       | 1       | 1       | 1      | 0     | 1         | 1          | 6   |
| miR-570-3p | <i>CCT5</i>      | 1       | 1       | 1       | 1      | 0     | 1         | 1          | 6   |
| miR-570-3p | <i>RIMS1</i>     | 1       | 1       | 1       | 1      | 0     | 1         | 1          | 6   |
| miR-570-3p | <i>WDFY3</i>     | 1       | 1       | 1       | 1      | 0     | 1         | 1          | 6   |
| miR-570-3p | <i>TMCC1</i>     | 1       | 1       | 1       | 1      | 0     | 1         | 1          | 6   |
| miR-570-3p | <i>KDM4B</i>     | 1       | 1       | 1       | 1      | 0     | 1         | 1          | 6   |
| miR-570-3p | <i>SAMD4A</i>    | 1       | 1       | 1       | 1      | 0     | 1         | 1          | 6   |
| miR-570-3p | <i>PHLPP2</i>    | 1       | 1       | 1       | 1      | 0     | 1         | 1          | 6   |

Table S1: Continued

| miRNA      | Gene            | miRWalk | Microt4 | miRanda | miRMap | RNA22 | RNAhybrid | Targetscan | SUM |
|------------|-----------------|---------|---------|---------|--------|-------|-----------|------------|-----|
| miR-570-3p | <i>WDTC1</i>    | 1       | 1       | 1       | 1      | 0     | 1         | 1          | 6   |
| miR-570-3p | <i>MYT1L</i>    | 1       | 1       | 1       | 0      | 1     | 1         | 1          | 6   |
| miR-570-3p | <i>SWAP70</i>   | 1       | 1       | 1       | 1      | 0     | 1         | 1          | 6   |
| miR-570-3p | <i>AVL9</i>     | 1       | 1       | 1       | 1      | 0     | 1         | 1          | 6   |
| miR-570-3p | <i>TRIM35</i>   | 1       | 1       | 1       | 1      | 0     | 1         | 1          | 6   |
| miR-570-3p | <i>CDK19</i>    | 1       | 1       | 1       | 1      | 0     | 1         | 1          | 6   |
| miR-570-3p | <i>TNRC6B</i>   | 1       | 1       | 1       | 1      | 0     | 1         | 1          | 6   |
| miR-570-3p | <i>NFASC</i>    | 1       | 1       | 1       | 1      | 0     | 1         | 1          | 6   |
| miR-570-3p | <i>HIC2</i>     | 1       | 1       | 1       | 1      | 0     | 1         | 1          | 6   |
| miR-570-3p | <i>ZZEF1</i>    | 1       | 1       | 1       | 1      | 0     | 1         | 1          | 6   |
| miR-570-3p | <i>DCUNID4</i>  | 1       | 1       | 1       | 1      | 0     | 1         | 1          | 6   |
| miR-570-3p | <i>SYT11</i>    | 1       | 1       | 1       | 1      | 0     | 1         | 1          | 6   |
| miR-570-3p | <i>ZC3H4</i>    | 0       | 1       | 1       | 1      | 1     | 1         | 1          | 6   |
| miR-570-3p | <i>FBXO28</i>   | 1       | 1       | 1       | 1      | 0     | 1         | 1          | 6   |
| miR-570-3p | <i>DTX4</i>     | 1       | 1       | 1       | 1      | 0     | 1         | 1          | 6   |
| miR-570-3p | <i>ARHGEF9</i>  | 1       | 1       | 1       | 1      | 0     | 1         | 1          | 6   |
| miR-570-3p | <i>PLCB1</i>    | 1       | 1       | 1       | 1      | 0     | 1         | 1          | 6   |
| miR-570-3p | <i>ANKRD12</i>  | 1       | 1       | 1       | 1      | 0     | 1         | 1          | 6   |
| miR-570-3p | <i>MGA</i>      | 1       | 1       | 1       | 1      | 0     | 1         | 1          | 6   |
| miR-570-3p | <i>CUX2</i>     | 1       | 1       | 1       | 1      | 0     | 1         | 1          | 6   |
| miR-570-3p | <i>USP22</i>    | 1       | 1       | 1       | 1      | 0     | 1         | 1          | 6   |
| miR-570-3p | <i>NEDD4L</i>   | 1       | 1       | 1       | 1      | 0     | 1         | 1          | 6   |
| miR-570-3p | <i>KIAA0895</i> | 0       | 1       | 1       | 1      | 1     | 1         | 1          | 6   |
| miR-570-3p | <i>MED13L</i>   | 1       | 1       | 1       | 1      | 0     | 1         | 1          | 6   |
| miR-570-3p | <i>EXOSC2</i>   | 1       | 1       | 1       | 1      | 0     | 1         | 1          | 6   |
| miR-570-3p | <i>DICER1</i>   | 1       | 1       | 1       | 1      | 0     | 1         | 1          | 6   |
| miR-570-3p | <i>SIRT1</i>    | 1       | 1       | 1       | 1      | 0     | 1         | 1          | 6   |
| miR-570-3p | <i>SLC44A1</i>  | 1       | 1       | 1       | 1      | 0     | 1         | 1          | 6   |
| miR-570-3p | <i>CBX5</i>     | 0       | 1       | 1       | 1      | 1     | 1         | 1          | 6   |
| miR-570-3p | <i>TRAM1</i>    | 1       | 1       | 1       | 1      | 0     | 1         | 1          | 6   |
| miR-570-3p | <i>SEZ6L</i>    | 0       | 1       | 1       | 1      | 1     | 1         | 1          | 6   |
| miR-570-3p | <i>DDAH1</i>    | 1       | 1       | 1       | 1      | 0     | 1         | 1          | 6   |
| miR-570-3p | <i>PRND</i>     | 1       | 1       | 1       | 1      | 0     | 1         | 1          | 6   |
| miR-570-3p | <i>SSBP3</i>    | 1       | 1       | 1       | 1      | 0     | 1         | 1          | 6   |
| miR-570-3p | <i>STX12</i>    | 1       | 1       | 1       | 1      | 0     | 1         | 1          | 6   |
| miR-570-3p | <i>SH3BP4</i>   | 1       | 1       | 1       | 1      | 0     | 1         | 1          | 6   |
| miR-570-3p | <i>MTCH2</i>    | 0       | 1       | 1       | 1      | 1     | 1         | 1          | 6   |
| miR-570-3p | <i>METTL7A</i>  | 1       | 1       | 1       | 1      | 0     | 1         | 1          | 6   |
| miR-570-3p | <i>MOB4</i>     | 0       | 1       | 1       | 1      | 1     | 1         | 1          | 6   |
| miR-570-3p | <i>RNF19A</i>   | 0       | 1       | 1       | 1      | 1     | 1         | 1          | 6   |

Table S1: Continued

| miRNA      | Gene              | miRWalk | Microt4 | miRanda | miRMap | RNA22 | RNAhybrid | Targetscan | SUM |
|------------|-------------------|---------|---------|---------|--------|-------|-----------|------------|-----|
| miR-570-3p | <i>THUMPD3</i>    | 0       | 1       | 1       | 1      | 1     | 1         | 1          | 6   |
| miR-570-3p | <i>C20orf194</i>  | 1       | 1       | 1       | 1      | 0     | 1         | 1          | 6   |
| miR-570-3p | <i>GPR124</i>     | 1       | 1       | 1       | 1      | 0     | 1         | 1          | 6   |
| miR-570-3p | <i>NUDT13</i>     | 1       | 1       | 1       | 1      | 0     | 1         | 1          | 6   |
| miR-570-3p | <i>C2CD2</i>      | 1       | 1       | 1       | 1      | 0     | 1         | 1          | 6   |
| miR-570-3p | <i>NGDN</i>       | 1       | 1       | 1       | 1      | 0     | 1         | 1          | 6   |
| miR-570-3p | <i>L3MBTL1</i>    | 1       | 1       | 1       | 1      | 0     | 1         | 1          | 6   |
| miR-570-3p | <i>LRP10</i>      | 1       | 1       | 1       | 1      | 0     | 1         | 1          | 6   |
| miR-570-3p | <i>SSI8L1</i>     | 0       | 1       | 1       | 1      | 1     | 1         | 1          | 6   |
| miR-570-3p | <i>FAM169A</i>    | 1       | 1       | 1       | 1      | 0     | 1         | 1          | 6   |
| miR-570-3p | <i>PPP1R16B</i>   | 1       | 1       | 1       | 1      | 0     | 1         | 1          | 6   |
| miR-570-3p | <i>AUTS2</i>      | 1       | 1       | 1       | 1      | 0     | 1         | 1          | 6   |
| miR-570-3p | <i>RAB11FIP5</i>  | 1       | 1       | 1       | 1      | 0     | 1         | 1          | 6   |
| miR-570-3p | <i>RAI14</i>      | 0       | 1       | 1       | 1      | 1     | 1         | 1          | 6   |
| miR-570-3p | <i>LSM14A</i>     | 1       | 1       | 1       | 1      | 0     | 1         | 1          | 6   |
| miR-570-3p | <i>SZRD1</i>      | 0       | 1       | 1       | 1      | 1     | 1         | 1          | 6   |
| miR-570-3p | <i>FBXL4</i>      | 1       | 1       | 1       | 1      | 0     | 1         | 1          | 6   |
| miR-570-3p | <i>BLOC1S6</i>    | 1       | 1       | 1       | 1      | 0     | 1         | 1          | 6   |
| miR-570-3p | <i>FBXO3</i>      | 1       | 1       | 1       | 1      | 0     | 1         | 1          | 6   |
| miR-570-3p | <i>GREM1</i>      | 1       | 1       | 1       | 1      | 0     | 1         | 1          | 6   |
| miR-570-3p | <i>ZBTB11</i>     | 1       | 1       | 1       | 1      | 0     | 1         | 1          | 6   |
| miR-570-3p | <i>KLHL20</i>     | 1       | 1       | 1       | 1      | 0     | 1         | 1          | 6   |
| miR-570-3p | <i>PCDH17</i>     | 1       | 1       | 1       | 1      | 0     | 1         | 1          | 6   |
| miR-570-3p | <i>PCDH11X</i>    | 0       | 1       | 1       | 1      | 1     | 1         | 1          | 6   |
| miR-570-3p | <i>HIPK2</i>      | 1       | 1       | 1       | 1      | 0     | 1         | 1          | 6   |
| miR-570-3p | <i>CCDC113</i>    | 1       | 1       | 1       | 1      | 0     | 1         | 1          | 6   |
| miR-570-3p | <i>TMOD3</i>      | 1       | 1       | 1       | 1      | 0     | 1         | 1          | 6   |
| miR-570-3p | <i>TFCP2L1</i>    | 1       | 1       | 1       | 1      | 0     | 1         | 1          | 6   |
| miR-570-3p | <i>SENPI1</i>     | 1       | 1       | 1       | 1      | 0     | 1         | 1          | 6   |
| miR-570-3p | <i>CNOT7</i>      | 1       | 1       | 1       | 1      | 0     | 1         | 1          | 6   |
| miR-570-3p | <i>SNX12</i>      | 0       | 1       | 1       | 1      | 1     | 1         | 1          | 6   |
| miR-570-3p | <i>HUNK</i>       | 1       | 1       | 1       | 1      | 0     | 1         | 1          | 6   |
| miR-570-3p | <i>ST6GALNAC6</i> | 1       | 1       | 1       | 1      | 0     | 1         | 1          | 6   |
| miR-570-3p | <i>ZBTB21</i>     | 0       | 1       | 1       | 1      | 1     | 1         | 1          | 6   |
| miR-570-3p | <i>MYEF2</i>      | 1       | 1       | 1       | 1      | 0     | 1         | 1          | 6   |
| miR-570-3p | <i>CDON</i>       | 1       | 1       | 1       | 1      | 0     | 1         | 1          | 6   |
| miR-570-3p | <i>TMED5</i>      | 1       | 1       | 1       | 1      | 0     | 1         | 1          | 6   |
| miR-570-3p | <i>TMED7</i>      | 1       | 1       | 1       | 1      | 0     | 1         | 1          | 6   |
| miR-570-3p | <i>ST8SIA3</i>    | 1       | 1       | 1       | 1      | 0     | 1         | 1          | 6   |
| miR-570-3p | <i>SEPSECS</i>    | 1       | 1       | 1       | 1      | 0     | 1         | 1          | 6   |

Table S1: Continued

| miRNA      | Gene            | miRWalk | Microt4 | miRanda | miRMap | RNA22 | RNAhybrid | Targetscan | SUM |
|------------|-----------------|---------|---------|---------|--------|-------|-----------|------------|-----|
| miR-570-3p | <i>SH3GLB1</i>  | 1       | 1       | 1       | 1      | 0     | 1         | 1          | 6   |
| miR-570-3p | <i>SAR1B</i>    | 0       | 1       | 1       | 1      | 1     | 1         | 1          | 6   |
| miR-570-3p | <i>PHF20</i>    | 1       | 1       | 1       | 1      | 0     | 1         | 1          | 6   |
| miR-570-3p | <i>CRIM1</i>    | 1       | 1       | 1       | 1      | 0     | 1         | 1          | 6   |
| miR-570-3p | <i>NIP7</i>     | 1       | 1       | 1       | 1      | 0     | 1         | 1          | 6   |
| miR-570-3p | <i>COMMD10</i>  | 1       | 1       | 1       | 1      | 0     | 1         | 1          | 6   |
| miR-570-3p | <i>FAM8A1</i>   | 1       | 1       | 1       | 1      | 0     | 1         | 1          | 6   |
| miR-570-3p | <i>CTDSPL2</i>  | 1       | 1       | 1       | 1      | 0     | 1         | 1          | 6   |
| miR-570-3p | <i>VPS54</i>    | 1       | 1       | 1       | 1      | 0     | 1         | 1          | 6   |
| miR-570-3p | <i>RAB14</i>    | 1       | 1       | 1       | 1      | 0     | 1         | 1          | 6   |
| miR-570-3p | <i>PEX5L</i>    | 1       | 1       | 1       | 1      | 0     | 1         | 1          | 6   |
| miR-570-3p | <i>TRIM33</i>   | 1       | 1       | 1       | 1      | 0     | 1         | 1          | 6   |
| miR-570-3p | <i>KLF13</i>    | 1       | 1       | 1       | 1      | 0     | 1         | 1          | 6   |
| miR-570-3p | <i>ATP8A2</i>   | 1       | 1       | 1       | 1      | 0     | 1         | 1          | 6   |
| miR-570-3p | <i>TM6SF1</i>   | 1       | 1       | 1       | 1      | 0     | 1         | 1          | 6   |
| miR-570-3p | <i>LRP1B</i>    | 1       | 1       | 1       | 1      | 0     | 1         | 1          | 6   |
| miR-570-3p | <i>CPSF2</i>    | 0       | 1       | 1       | 1      | 1     | 1         | 1          | 6   |
| miR-570-3p | <i>BRWD1</i>    | 0       | 1       | 1       | 1      | 1     | 1         | 1          | 6   |
| miR-570-3p | <i>C21orf91</i> | 0       | 1       | 1       | 1      | 1     | 1         | 1          | 6   |
| miR-570-3p | <i>ATAD2B</i>   | 1       | 1       | 1       | 1      | 0     | 1         | 1          | 6   |
| miR-570-3p | <i>ANKIB1</i>   | 1       | 1       | 1       | 1      | 0     | 1         | 1          | 6   |
| miR-570-3p | <i>SPATA6</i>   | 1       | 1       | 1       | 1      | 0     | 1         | 1          | 6   |
| miR-570-3p | <i>MAP10</i>    | 1       | 1       | 1       | 1      | 0     | 1         | 1          | 6   |
| miR-570-3p | <i>TMEM106B</i> | 1       | 1       | 1       | 0      | 1     | 1         | 1          | 6   |
| miR-570-3p | <i>RSBN1</i>    | 1       | 1       | 1       | 1      | 0     | 1         | 1          | 6   |
| miR-570-3p | <i>CRLS1</i>    | 0       | 1       | 1       | 1      | 1     | 1         | 1          | 6   |
| miR-570-3p | <i>Mar-05</i>   | 1       | 1       | 1       | 1      | 0     | 1         | 1          | 6   |
| miR-570-3p | <i>OTUD4</i>    | 1       | 1       | 1       | 1      | 0     | 1         | 1          | 6   |
| miR-570-3p | <i>IL17RD</i>   | 1       | 1       | 1       | 1      | 0     | 1         | 1          | 6   |
| miR-570-3p | <i>ZRANB1</i>   | 1       | 1       | 1       | 1      | 0     | 1         | 1          | 6   |
| miR-570-3p | <i>DNAJB12</i>  | 0       | 1       | 1       | 1      | 1     | 1         | 1          | 6   |
| miR-570-3p | <i>TET2</i>     | 1       | 1       | 1       | 1      | 0     | 1         | 1          | 6   |
| miR-570-3p | <i>BNC2</i>     | 1       | 1       | 1       | 1      | 0     | 1         | 1          | 6   |
| miR-570-3p | <i>BIVM</i>     | 1       | 1       | 1       | 1      | 0     | 1         | 1          | 6   |
| miR-570-3p | <i>PIGG</i>     | 1       | 1       | 1       | 1      | 0     | 1         | 1          | 6   |
| miR-570-3p | <i>DPP8</i>     | 1       | 1       | 1       | 1      | 0     | 1         | 1          | 6   |
| miR-570-3p | <i>LPPR1</i>    | 1       | 1       | 1       | 1      | 0     | 1         | 1          | 6   |
| miR-570-3p | <i>INO80D</i>   | 1       | 1       | 1       | 1      | 0     | 1         | 1          | 6   |
| miR-570-3p | <i>CMTM6</i>    | 1       | 1       | 1       | 1      | 0     | 1         | 1          | 6   |
| miR-570-3p | <i>IMPAD1</i>   | 1       | 1       | 1       | 1      | 0     | 1         | 1          | 6   |



Table S1: Continued

| miRNA      | Gene             | miRWalk | Microt4 | miRanda | miRMap | RNA22 | RNAhybrid | Targetscan | SUM |
|------------|------------------|---------|---------|---------|--------|-------|-----------|------------|-----|
| miR-570-3p | <i>PARP16</i>    | 1       | 1       | 1       | 1      | 0     | 1         | 1          | 6   |
| miR-570-3p | <i>SLC35F6</i>   | 1       | 1       | 1       | 1      | 0     | 1         | 1          | 6   |
| miR-570-3p | <i>PLEKHB2</i>   | 1       | 1       | 1       | 1      | 0     | 1         | 1          | 6   |
| miR-570-3p | <i>PDPR</i>      | 1       | 1       | 1       | 1      | 0     | 1         | 1          | 6   |
| miR-570-3p | <i>DET1</i>      | 1       | 1       | 1       | 1      | 0     | 1         | 1          | 6   |
| miR-570-3p | <i>C10orf118</i> | 1       | 1       | 1       | 1      | 0     | 1         | 1          | 6   |
| miR-570-3p | <i>PRPF38B</i>   | 1       | 1       | 1       | 1      | 0     | 1         | 1          | 6   |
| miR-570-3p | <i>LARP1B</i>    | 0       | 1       | 1       | 1      | 1     | 1         | 1          | 6   |
| miR-570-3p | <i>MSL2</i>      | 0       | 1       | 1       | 1      | 1     | 1         | 1          | 6   |
| miR-570-3p | <i>SMG8</i>      | 0       | 1       | 1       | 1      | 1     | 1         | 1          | 6   |
| miR-570-3p | <i>SBNO1</i>     | 1       | 1       | 1       | 1      | 0     | 1         | 1          | 6   |
| miR-570-3p | <i>SMU1</i>      | 0       | 1       | 1       | 1      | 1     | 1         | 1          | 6   |
| miR-570-3p | <i>VPS53</i>     | 1       | 1       | 1       | 1      | 0     | 1         | 1          | 6   |
| miR-570-3p | <i>ZNF654</i>    | 1       | 1       | 1       | 1      | 0     | 1         | 1          | 6   |
| miR-570-3p | <i>LIN7C</i>     | 1       | 1       | 1       | 1      | 0     | 1         | 1          | 6   |
| miR-570-3p | <i>YOD1</i>      | 1       | 1       | 1       | 1      | 0     | 1         | 1          | 6   |
| miR-570-3p | <i>ETNK1</i>     | 1       | 1       | 1       | 1      | 0     | 1         | 1          | 6   |
| miR-570-3p | <i>ELMOD1</i>    | 1       | 1       | 1       | 1      | 0     | 1         | 1          | 6   |
| miR-570-3p | <i>SOX6</i>      | 1       | 1       | 1       | 1      | 0     | 1         | 1          | 6   |
| miR-570-3p | <i>FAM46A</i>    | 1       | 1       | 1       | 1      | 0     | 1         | 1          | 6   |
| miR-570-3p | <i>ZNF407</i>    | 0       | 1       | 1       | 1      | 1     | 1         | 1          | 6   |
| miR-570-3p | <i>G2E3</i>      | 1       | 1       | 1       | 1      | 0     | 1         | 1          | 6   |
| miR-570-3p | <i>SLC30A6</i>   | 1       | 1       | 1       | 1      | 0     | 1         | 1          | 6   |
| miR-570-3p | <i>WDR11</i>     | 1       | 1       | 1       | 1      | 0     | 1         | 1          | 6   |
| miR-570-3p | <i>Sep-11</i>    | 1       | 1       | 1       | 1      | 0     | 1         | 1          | 6   |
| miR-570-3p | <i>TMEM30A</i>   | 1       | 1       | 1       | 1      | 0     | 1         | 1          | 6   |
| miR-570-3p | <i>MCTP2</i>     | 1       | 1       | 1       | 1      | 0     | 1         | 1          | 6   |
| miR-570-3p | <i>FGD6</i>      | 1       | 1       | 1       | 1      | 0     | 1         | 1          | 6   |
| miR-570-3p | <i>TRERF1</i>    | 1       | 1       | 1       | 1      | 0     | 1         | 1          | 6   |
| miR-570-3p | <i>UBAP2</i>     | 1       | 1       | 1       | 1      | 0     | 1         | 1          | 6   |
| miR-570-3p | <i>ASH1L</i>     | 1       | 1       | 1       | 1      | 0     | 1         | 1          | 6   |
| miR-570-3p | <i>ZNF395</i>    | 1       | 1       | 1       | 1      | 0     | 1         | 1          | 6   |
| miR-570-3p | <i>CTTNBP2NL</i> | 1       | 1       | 1       | 1      | 0     | 1         | 1          | 6   |
| miR-570-3p | <i>PCDHA6</i>    | 1       | 1       | 1       | 1      | 0     | 1         | 1          | 6   |
| miR-570-3p | <i>LMOD3</i>     | 1       | 1       | 1       | 1      | 0     | 1         | 1          | 6   |
| miR-570-3p | <i>CLDND1</i>    | 1       | 1       | 1       | 1      | 0     | 1         | 1          | 6   |
| miR-570-3p | <i>JPH1</i>      | 1       | 1       | 1       | 1      | 0     | 1         | 1          | 6   |
| miR-570-3p | <i>SPIRE1</i>    | 1       | 1       | 1       | 1      | 0     | 1         | 1          | 6   |
| miR-570-3p | <i>CA10</i>      | 1       | 1       | 1       | 1      | 0     | 1         | 1          | 6   |
| miR-570-3p | <i>PMEPA1</i>    | 0       | 1       | 1       | 1      | 1     | 1         | 1          | 6   |

Table S1: Continued

| miRNA      | Gene            | miRWalk | Microt4 | miRanda | miRMap | RNA22 | RNAhybrid | Targetscan | SUM |
|------------|-----------------|---------|---------|---------|--------|-------|-----------|------------|-----|
| miR-570-3p | <i>LHX9</i>     | 1       | 1       | 1       | 1      | 0     | 1         | 1          | 6   |
| miR-570-3p | <i>STOX2</i>    | 1       | 1       | 1       | 1      | 0     | 1         | 1          | 6   |
| miR-570-3p | <i>BBX</i>      | 1       | 1       | 1       | 1      | 0     | 1         | 1          | 6   |
| miR-570-3p | <i>CDC42SE2</i> | 1       | 1       | 1       | 1      | 0     | 1         | 1          | 6   |
| miR-570-3p | <i>TWSG1</i>    | 1       | 1       | 1       | 1      | 0     | 1         | 1          | 6   |
| miR-570-3p | <i>GOPC</i>     | 1       | 1       | 1       | 1      | 0     | 1         | 1          | 6   |
| miR-570-3p | <i>SLC39A10</i> | 1       | 1       | 1       | 1      | 0     | 1         | 1          | 6   |
| miR-570-3p | <i>KIAA1244</i> | 1       | 1       | 0       | 1      | 1     | 1         | 1          | 6   |
| miR-570-3p | <i>ZNF286A</i>  | 1       | 1       | 1       | 1      | 0     | 1         | 1          | 6   |
| miR-570-3p | <i>TMCC3</i>    | 1       | 1       | 1       | 1      | 0     | 1         | 1          | 6   |
| miR-570-3p | <i>GATAD2B</i>  | 1       | 1       | 1       | 1      | 0     | 1         | 1          | 6   |
| miR-570-3p | <i>PPM1H</i>    | 1       | 1       | 1       | 1      | 0     | 1         | 1          | 6   |
| miR-570-3p | <i>ERMN</i>     | 1       | 1       | 1       | 1      | 0     | 1         | 1          | 6   |
| miR-570-3p | <i>GRAMD1B</i>  | 1       | 1       | 1       | 1      | 0     | 1         | 1          | 6   |
| miR-570-3p | <i>NLN</i>      | 1       | 1       | 1       | 1      | 0     | 1         | 1          | 6   |
| miR-570-3p | <i>RIMKLB</i>   | 1       | 1       | 1       | 1      | 0     | 1         | 1          | 6   |
| miR-570-3p | <i>MKL2</i>     | 1       | 1       | 1       | 1      | 0     | 1         | 1          | 6   |
| miR-570-3p | <i>MTA3</i>     | 1       | 1       | 1       | 1      | 0     | 1         | 1          | 6   |
| miR-570-3p | <i>INTS2</i>    | 1       | 1       | 1       | 1      | 0     | 1         | 1          | 6   |
| miR-570-3p | <i>NUFIP2</i>   | 1       | 1       | 1       | 1      | 0     | 1         | 1          | 6   |
| miR-570-3p | <i>MIB1</i>     | 1       | 1       | 1       | 1      | 0     | 1         | 1          | 6   |
| miR-570-3p | <i>SEMA6A</i>   | 0       | 1       | 1       | 1      | 1     | 1         | 1          | 6   |
| miR-570-3p | <i>KLHL14</i>   | 0       | 1       | 1       | 1      | 1     | 1         | 1          | 6   |
| miR-570-3p | <i>TMEM181</i>  | 1       | 1       | 1       | 1      | 0     | 1         | 1          | 6   |
| miR-570-3p | <i>KIAA1430</i> | 1       | 1       | 1       | 1      | 0     | 1         | 1          | 6   |
| miR-570-3p | <i>WDFY1</i>    | 1       | 1       | 1       | 1      | 0     | 1         | 1          | 6   |
| miR-570-3p | <i>FNIP2</i>    | 1       | 1       | 1       | 1      | 0     | 1         | 1          | 6   |
| miR-570-3p | <i>RANBP10</i>  | 1       | 1       | 1       | 1      | 0     | 1         | 1          | 6   |
| miR-570-3p | <i>ISLR2</i>    | 1       | 1       | 1       | 1      | 0     | 1         | 1          | 6   |
| miR-570-3p | <i>SHROOM3</i>  | 1       | 1       | 1       | 1      | 0     | 1         | 1          | 6   |
| miR-570-3p | <i>DPP10</i>    | 0       | 1       | 1       | 1      | 1     | 1         | 1          | 6   |
| miR-570-3p | <i>FBRSL1</i>   | 1       | 1       | 1       | 1      | 0     | 1         | 1          | 6   |
| miR-570-3p | <i>KIAA1549</i> | 1       | 1       | 1       | 1      | 0     | 1         | 1          | 6   |
| miR-570-3p | <i>GPAM</i>     | 1       | 1       | 1       | 1      | 0     | 1         | 1          | 6   |
| miR-570-3p | <i>KIAA1598</i> | 1       | 1       | 1       | 1      | 0     | 1         | 1          | 6   |
| miR-570-3p | <i>FAM160B1</i> | 1       | 1       | 1       | 1      | 0     | 1         | 1          | 6   |
| miR-570-3p | <i>SLC7A14</i>  | 1       | 1       | 1       | 1      | 0     | 1         | 1          | 6   |
| miR-570-3p | <i>SFMBT2</i>   | 1       | 1       | 1       | 1      | 0     | 1         | 1          | 6   |
| miR-570-3p | <i>GPR107</i>   | 1       | 1       | 1       | 1      | 0     | 1         | 1          | 6   |
| miR-570-3p | <i>EPG5</i>     | 1       | 1       | 1       | 1      | 0     | 1         | 1          | 6   |

Table S1: Continued

| miRNA      | Gene            | miRWalk | Microt4 | miRanda | miRMap | RNA22 | RNAhybrid | Targetscan | SUM |
|------------|-----------------|---------|---------|---------|--------|-------|-----------|------------|-----|
| miR-570-3p | <i>TP53INP2</i> | 1       | 1       | 1       | 1      | 0     | 1         | 1          | 6   |
| miR-570-3p | <i>FAM60A</i>   | 1       | 1       | 1       | 1      | 0     | 1         | 1          | 6   |
| miR-570-3p | <i>SNX6</i>     | 1       | 1       | 1       | 1      | 0     | 1         | 1          | 6   |
| miR-570-3p | <i>TGIF2</i>    | 1       | 1       | 1       | 1      | 0     | 1         | 1          | 6   |
| miR-570-3p | <i>BACH2</i>    | 1       | 1       | 1       | 1      | 0     | 1         | 1          | 6   |
| miR-570-3p | <i>BCORL1</i>   | 1       | 1       | 1       | 1      | 0     | 1         | 1          | 6   |
| miR-570-3p | <i>PRDM15</i>   | 0       | 1       | 1       | 1      | 1     | 1         | 1          | 6   |
| miR-570-3p | <i>NPAS3</i>    | 1       | 1       | 1       | 1      | 0     | 1         | 1          | 6   |
| miR-570-3p | <i>C10orf54</i> | 1       | 1       | 1       | 1      | 0     | 1         | 1          | 6   |
| miR-570-3p | <i>XYLT1</i>    | 1       | 1       | 1       | 1      | 0     | 1         | 1          | 6   |
| miR-570-3p | <i>NECAB1</i>   | 1       | 1       | 1       | 1      | 0     | 1         | 1          | 6   |
| miR-570-3p | <i>PAPD5</i>    | 1       | 1       | 1       | 1      | 0     | 1         | 1          | 6   |
| miR-570-3p | <i>ZMAT3</i>    | 1       | 1       | 1       | 1      | 0     | 1         | 1          | 6   |
| miR-570-3p | <i>COPS7B</i>   | 1       | 1       | 1       | 1      | 0     | 1         | 1          | 6   |
| miR-570-3p | <i>ACBD3</i>    | 1       | 1       | 1       | 1      | 0     | 1         | 1          | 6   |
| miR-570-3p | <i>RMND5A</i>   | 1       | 1       | 1       | 1      | 0     | 1         | 1          | 6   |
| miR-570-3p | <i>YTHDC2</i>   | 1       | 1       | 1       | 1      | 0     | 1         | 1          | 6   |
| miR-570-3p | <i>USP46</i>    | 1       | 1       | 1       | 1      | 0     | 1         | 1          | 6   |
| miR-570-3p | <i>REFX7</i>    | 1       | 1       | 1       | 1      | 0     | 1         | 1          | 6   |
| miR-570-3p | <i>RANBP17</i>  | 1       | 1       | 1       | 1      | 0     | 1         | 1          | 6   |
| miR-570-3p | <i>CASD1</i>    | 1       | 1       | 1       | 1      | 0     | 1         | 1          | 6   |
| miR-570-3p | <i>REEP1</i>    | 1       | 1       | 1       | 1      | 0     | 1         | 1          | 6   |
| miR-570-3p | <i>WNK3</i>     | 1       | 1       | 1       | 1      | 0     | 1         | 1          | 6   |
| miR-570-3p | <i>ZBTB10</i>   | 1       | 1       | 1       | 1      | 0     | 1         | 1          | 6   |
| miR-570-3p | <i>MTMR9</i>    | 1       | 1       | 1       | 1      | 0     | 1         | 1          | 6   |
| miR-570-3p | <i>BOLL</i>     | 1       | 1       | 1       | 1      | 0     | 1         | 1          | 6   |
| miR-570-3p | <i>TMEM43</i>   | 1       | 1       | 1       | 1      | 0     | 1         | 1          | 6   |
| miR-570-3p | <i>RNF219</i>   | 1       | 1       | 1       | 1      | 0     | 1         | 1          | 6   |
| miR-570-3p | <i>RIC3</i>     | 1       | 1       | 1       | 1      | 0     | 1         | 1          | 6   |
| miR-570-3p | <i>ARHGAP10</i> | 1       | 1       | 1       | 1      | 0     | 1         | 1          | 6   |
| miR-570-3p | <i>ZMAT4</i>    | 1       | 1       | 1       | 1      | 0     | 1         | 1          | 6   |
| miR-570-3p | <i>ZYG11B</i>   | 1       | 1       | 1       | 1      | 0     | 1         | 1          | 6   |
| miR-570-3p | <i>TBL1XR1</i>  | 1       | 1       | 1       | 1      | 0     | 1         | 1          | 6   |
| miR-570-3p | <i>SNIP1</i>    | 1       | 1       | 1       | 1      | 0     | 1         | 1          | 6   |
| miR-570-3p | <i>MOB3B</i>    | 1       | 1       | 1       | 1      | 0     | 1         | 1          | 6   |
| miR-570-3p | <i>THSD4</i>    | 1       | 1       | 1       | 1      | 0     | 1         | 1          | 6   |
| miR-570-3p | <i>MCMBP</i>    | 1       | 1       | 1       | 1      | 0     | 1         | 1          | 6   |
| miR-570-3p | <i>CYBRD1</i>   | 1       | 1       | 1       | 1      | 0     | 1         | 1          | 6   |
| miR-570-3p | <i>ERMP1</i>    | 1       | 1       | 1       | 1      | 0     | 1         | 1          | 6   |
| miR-570-3p | <i>C10orf88</i> | 1       | 1       | 0       | 1      | 1     | 1         | 1          | 6   |

Table S1: Continued

| miRNA      | Gene             | miRWalk | Microt4 | miRanda | miRMap | RNA22 | RNAhybrid | Targetscan | SUM |
|------------|------------------|---------|---------|---------|--------|-------|-----------|------------|-----|
| miR-570-3p | <i>PHC3</i>      | 1       | 1       | 1       | 1      | 0     | 1         | 1          | 6   |
| miR-570-3p | <i>WWC2</i>      | 1       | 1       | 1       | 1      | 0     | 1         | 1          | 6   |
| miR-570-3p | <i>TRPM3</i>     | 1       | 1       | 1       | 1      | 0     | 1         | 1          | 6   |
| miR-570-3p | <i>PGAP1</i>     | 1       | 1       | 1       | 1      | 0     | 1         | 1          | 6   |
| miR-570-3p | <i>CCDC176</i>   | 1       | 1       | 1       | 1      | 0     | 1         | 1          | 6   |
| miR-570-3p | <i>CCDC170</i>   | 1       | 1       | 1       | 1      | 0     | 1         | 1          | 6   |
| miR-570-3p | <i>SIKE1</i>     | 1       | 1       | 1       | 1      | 0     | 1         | 1          | 6   |
| miR-570-3p | <i>WDR26</i>     | 1       | 1       | 1       | 1      | 0     | 1         | 1          | 6   |
| miR-570-3p | <i>EPC1</i>      | 1       | 1       | 1       | 1      | 0     | 1         | 1          | 6   |
| miR-570-3p | <i>KCNIP4</i>    | 1       | 1       | 1       | 1      | 0     | 1         | 1          | 6   |
| miR-570-3p | <i>CYB5B</i>     | 1       | 1       | 1       | 1      | 0     | 1         | 1          | 6   |
| miR-570-3p | <i>DDHD1</i>     | 1       | 1       | 1       | 1      | 0     | 1         | 1          | 6   |
| miR-570-3p | <i>ZFP91</i>     | 0       | 1       | 1       | 1      | 1     | 1         | 1          | 6   |
| miR-570-3p | <i>JHDM1D</i>    | 1       | 1       | 1       | 1      | 0     | 1         | 1          | 6   |
| miR-570-3p | <i>FAM49A</i>    | 1       | 1       | 1       | 1      | 0     | 1         | 1          | 6   |
| miR-570-3p | <i>FAM117A</i>   | 1       | 1       | 1       | 1      | 0     | 1         | 1          | 6   |
| miR-570-3p | <i>SNX27</i>     | 1       | 1       | 1       | 1      | 0     | 1         | 1          | 6   |
| miR-570-3p | <i>ANP32E</i>    | 1       | 1       | 1       | 1      | 0     | 1         | 1          | 6   |
| miR-570-3p | <i>MAP1LC3B</i>  | 1       | 1       | 1       | 1      | 0     | 1         | 1          | 6   |
| miR-570-3p | <i>VANGL1</i>    | 1       | 1       | 1       | 1      | 0     | 1         | 1          | 6   |
| miR-570-3p | <i>SEHIL</i>     | 1       | 1       | 1       | 1      | 0     | 1         | 1          | 6   |
| miR-570-3p | <i>PCDH11Y</i>   | 0       | 1       | 1       | 1      | 1     | 1         | 1          | 6   |
| miR-570-3p | <i>RAB33B</i>    | 1       | 1       | 1       | 1      | 0     | 1         | 1          | 6   |
| miR-570-3p | <i>FAM167A</i>   | 1       | 1       | 1       | 1      | 0     | 1         | 1          | 6   |
| miR-570-3p | <i>CALN1</i>     | 1       | 1       | 1       | 1      | 0     | 1         | 1          | 6   |
| miR-570-3p | <i>SH3BGRL2</i>  | 0       | 1       | 1       | 1      | 1     | 1         | 1          | 6   |
| miR-570-3p | <i>SETDB2</i>    | 1       | 1       | 1       | 1      | 0     | 1         | 1          | 6   |
| miR-570-3p | <i>FAM172A</i>   | 1       | 1       | 1       | 1      | 0     | 1         | 1          | 6   |
| miR-570-3p | <i>B3GNT5</i>    | 1       | 1       | 1       | 1      | 0     | 1         | 1          | 6   |
| miR-570-3p | <i>MAGT1</i>     | 1       | 1       | 1       | 1      | 0     | 1         | 1          | 6   |
| miR-570-3p | <i>SLC10A7</i>   | 1       | 1       | 1       | 1      | 0     | 1         | 1          | 6   |
| miR-570-3p | <i>LRR1Q1</i>    | 1       | 1       | 1       | 1      | 0     | 1         | 1          | 6   |
| miR-570-3p | <i>UTP15</i>     | 1       | 1       | 1       | 1      | 0     | 1         | 1          | 6   |
| miR-570-3p | <i>RNASEH2C</i>  | 0       | 1       | 1       | 1      | 1     | 1         | 1          | 6   |
| miR-570-3p | <i>ARID5B</i>    | 0       | 1       | 1       | 1      | 1     | 1         | 1          | 6   |
| miR-570-3p | <i>HSDL2</i>     | 1       | 1       | 1       | 1      | 0     | 1         | 1          | 6   |
| miR-570-3p | <i>PHF6</i>      | 1       | 1       | 1       | 1      | 0     | 1         | 1          | 6   |
| miR-570-3p | <i>SARNP</i>     | 1       | 1       | 1       | 1      | 0     | 1         | 1          | 6   |
| miR-570-3p | <i>RAB11FIP4</i> | 1       | 1       | 1       | 1      | 0     | 1         | 1          | 6   |
| miR-570-3p | <i>PHYHIPL</i>   | 1       | 1       | 1       | 1      | 0     | 1         | 1          | 6   |

Table S1: Continued

| miRNA      | Gene            | miRWalk | Microt4 | miRanda | miRMap | RNA22 | RNAhybrid | Targetscan | SUM |
|------------|-----------------|---------|---------|---------|--------|-------|-----------|------------|-----|
| miR-570-3p | <i>LCOR</i>     | 0       | 1       | 1       | 1      | 1     | 1         | 1          | 6   |
| miR-570-3p | <i>FAXC</i>     | 1       | 1       | 1       | 1      | 0     | 1         | 1          | 6   |
| miR-570-3p | <i>PARD6B</i>   | 1       | 1       | 1       | 1      | 0     | 1         | 1          | 6   |
| miR-570-3p | <i>RNASE7</i>   | 1       | 1       | 1       | 1      | 0     | 1         | 1          | 6   |
| miR-570-3p | <i>FAM136A</i>  | 1       | 1       | 1       | 1      | 0     | 1         | 1          | 6   |
| miR-570-3p | <i>ZNRF1</i>    | 1       | 1       | 1       | 1      | 0     | 1         | 1          | 6   |
| miR-570-3p | <i>KIAA1671</i> | 1       | 1       | 1       | 1      | 0     | 1         | 1          | 6   |
| miR-570-3p | <i>KIAA1737</i> | 1       | 1       | 1       | 1      | 0     | 1         | 1          | 6   |
| miR-570-3p | <i>ZC3H12C</i>  | 1       | 1       | 1       | 1      | 0     | 1         | 1          | 6   |
| miR-570-3p | <i>SSH2</i>     | 1       | 1       | 1       | 1      | 0     | 1         | 1          | 6   |
| miR-570-3p | <i>SSH2</i>     | 1       | 1       | 1       | 1      | 0     | 1         | 1          | 6   |
| miR-570-3p | <i>EPT1</i>     | 1       | 1       | 1       | 1      | 0     | 1         | 1          | 6   |
| miR-570-3p | <i>NAV2</i>     | 1       | 1       | 1       | 1      | 0     | 1         | 1          | 6   |
| miR-570-3p | <i>MIDN</i>     | 1       | 1       | 1       | 1      | 0     | 1         | 1          | 6   |
| miR-570-3p | <i>CCDC120</i>  | 1       | 1       | 1       | 1      | 0     | 1         | 1          | 6   |
| miR-570-3p | <i>KCNH7</i>    | 1       | 1       | 1       | 1      | 0     | 1         | 1          | 6   |
| miR-570-3p | <i>HS6ST2</i>   | 1       | 1       | 1       | 1      | 0     | 1         | 1          | 6   |
| miR-570-3p | <i>FAM105B</i>  | 1       | 1       | 1       | 1      | 0     | 1         | 1          | 6   |
| miR-570-3p | <i>STARD13</i>  | 0       | 1       | 1       | 1      | 1     | 1         | 1          | 6   |
| miR-570-3p | <i>ZNF697</i>   | 1       | 1       | 1       | 1      | 0     | 1         | 1          | 6   |
| miR-570-3p | <i>SESTD1</i>   | 1       | 1       | 1       | 1      | 0     | 1         | 1          | 6   |
| miR-570-3p | <i>PLXNA4</i>   | 1       | 1       | 1       | 1      | 0     | 1         | 1          | 6   |
| miR-570-3p | <i>ELMSAN1</i>  | 1       | 1       | 1       | 1      | 0     | 1         | 1          | 6   |
| miR-570-3p | <i>CABLES1</i>  | 1       | 1       | 1       | 1      | 0     | 1         | 1          | 6   |
| miR-570-3p | <i>HNRNPLL</i>  | 1       | 1       | 1       | 1      | 0     | 1         | 1          | 6   |
| miR-570-3p | <i>MYOCD</i>    | 1       | 1       | 1       | 1      | 0     | 1         | 1          | 6   |
| miR-570-3p | <i>DTD2</i>     | 1       | 1       | 1       | 1      | 0     | 1         | 1          | 6   |
| miR-570-3p | <i>FMNL2</i>    | 1       | 1       | 1       | 1      | 0     | 1         | 1          | 6   |
| miR-570-3p | <i>ELFN2</i>    | 1       | 1       | 1       | 1      | 0     | 1         | 1          | 6   |
| miR-570-3p | <i>ZNF618</i>   | 1       | 1       | 1       | 1      | 0     | 1         | 1          | 6   |
| miR-570-3p | <i>SLC26A7</i>  | 1       | 1       | 1       | 1      | 0     | 1         | 1          | 6   |
| miR-570-3p | <i>KCTD12</i>   | 1       | 1       | 1       | 1      | 0     | 1         | 1          | 6   |
| miR-570-3p | <i>FCRL3</i>    | 1       | 1       | 1       | 1      | 0     | 1         | 1          | 6   |
| miR-570-3p | <i>CYYR1</i>    | 0       | 1       | 1       | 1      | 1     | 1         | 1          | 6   |
| miR-570-3p | <i>C8orf34</i>  | 1       | 1       | 1       | 1      | 0     | 1         | 1          | 6   |
| miR-570-3p | <i>RAB3IP</i>   | 1       | 1       | 1       | 1      | 0     | 1         | 1          | 6   |
| miR-570-3p | <i>ANTXR2</i>   | 1       | 1       | 1       | 1      | 0     | 1         | 1          | 6   |
| miR-570-3p | <i>C10orf90</i> | 1       | 1       | 1       | 1      | 0     | 1         | 1          | 6   |
| miR-570-3p | <i>SOCS4</i>    | 0       | 1       | 1       | 1      | 1     | 1         | 1          | 6   |
| miR-570-3p | <i>TC2N</i>     | 1       | 1       | 1       | 1      | 0     | 1         | 1          | 6   |

Table S1: Continued

| miRNA      | Gene            | miRWalk | Microt4 | miRanda | miRMap | RNA22 | RNAhybrid | Targetscan | SUM |
|------------|-----------------|---------|---------|---------|--------|-------|-----------|------------|-----|
| miR-570-3p | <i>NLRP5</i>    | 1       | 1       | 1       | 1      | 0     | 1         | 1          | 6   |
| miR-570-3p | <i>SYT2</i>     | 1       | 1       | 1       | 1      | 0     | 1         | 1          | 6   |
| miR-570-3p | <i>UHMK1</i>    | 1       | 1       | 1       | 1      | 0     | 1         | 1          | 6   |
| miR-570-3p | <i>LIXIL</i>    | 1       | 1       | 1       | 1      | 0     | 1         | 1          | 6   |
| miR-570-3p | <i>TBC1D20</i>  | 1       | 1       | 1       | 1      | 0     | 1         | 1          | 6   |
| miR-570-3p | <i>DUSP15</i>   | 1       | 1       | 1       | 1      | 0     | 1         | 1          | 6   |
| miR-570-3p | <i>FAM168B</i>  | 1       | 1       | 0       | 1      | 1     | 1         | 1          | 6   |
| miR-570-3p | <i>LYPD6</i>    | 1       | 1       | 1       | 1      | 0     | 1         | 1          | 6   |
| miR-570-3p | <i>KCNH8</i>    | 1       | 1       | 1       | 1      | 0     | 1         | 1          | 6   |
| miR-570-3p | <i>PPARGC1B</i> | 1       | 1       | 1       | 1      | 0     | 1         | 1          | 6   |
| miR-570-3p | <i>STARD4</i>   | 1       | 1       | 1       | 1      | 0     | 1         | 1          | 6   |
| miR-570-3p | <i>WDR36</i>    | 1       | 1       | 1       | 1      | 0     | 1         | 1          | 6   |
| miR-570-3p | <i>C5orf24</i>  | 1       | 1       | 1       | 1      | 0     | 1         | 1          | 6   |
| miR-570-3p | <i>CD109</i>    | 1       | 1       | 1       | 1      | 0     | 1         | 1          | 6   |
| miR-570-3p | <i>MTPN</i>     | 1       | 1       | 1       | 1      | 0     | 1         | 1          | 6   |
| miR-570-3p | <i>UBXN2B</i>   | 1       | 1       | 1       | 1      | 0     | 1         | 1          | 6   |
| miR-570-3p | <i>NACC2</i>    | 1       | 1       | 1       | 1      | 0     | 1         | 1          | 6   |
| miR-570-3p | <i>SLITRK4</i>  | 1       | 1       | 1       | 1      | 0     | 1         | 1          | 6   |
| miR-570-3p | <i>SOGA1</i>    | 0       | 1       | 1       | 1      | 1     | 1         | 1          | 6   |
| miR-570-3p | <i>ZNF280B</i>  | 1       | 1       | 1       | 1      | 0     | 1         | 1          | 6   |
| miR-570-3p | <i>PABPC5</i>   | 1       | 1       | 1       | 1      | 0     | 1         | 1          | 6   |
| miR-570-3p | <i>CACUL1</i>   | 0       | 1       | 1       | 1      | 1     | 1         | 1          | 6   |
| miR-570-3p | <i>SESN3</i>    | 1       | 1       | 1       | 1      | 0     | 1         | 1          | 6   |
| miR-570-3p | <i>E2F7</i>     | 1       | 1       | 1       | 1      | 0     | 1         | 1          | 6   |
| miR-570-3p | <i>CMTM4</i>    | 1       | 1       | 1       | 1      | 0     | 1         | 1          | 6   |
| miR-570-3p | <i>RUNDC1</i>   | 1       | 1       | 1       | 1      | 0     | 1         | 1          | 6   |
| miR-570-3p | <i>C18orf25</i> | 1       | 1       | 1       | 1      | 0     | 1         | 1          | 6   |
| miR-570-3p | <i>CCBE1</i>    | 1       | 1       | 1       | 1      | 0     | 1         | 1          | 6   |
| miR-570-3p | <i>SYT6</i>     | 1       | 1       | 1       | 1      | 0     | 1         | 1          | 6   |
| miR-570-3p | <i>PHF13</i>    | 1       | 1       | 1       | 1      | 0     | 1         | 1          | 6   |
| miR-570-3p | <i>SLC30A7</i>  | 1       | 1       | 1       | 1      | 0     | 1         | 1          | 6   |
| miR-570-3p | <i>PDIK1L</i>   | 1       | 1       | 1       | 1      | 0     | 1         | 1          | 6   |
| miR-570-3p | <i>CCDC117</i>  | 1       | 1       | 1       | 1      | 0     | 1         | 1          | 6   |
| miR-570-3p | <i>ARL6IP6</i>  | 1       | 1       | 1       | 1      | 0     | 1         | 1          | 6   |
| miR-570-3p | <i>CCNYL1</i>   | 1       | 1       | 1       | 1      | 0     | 1         | 1          | 6   |
| miR-570-3p | <i>PPP1R1C</i>  | 1       | 1       | 1       | 1      | 0     | 1         | 1          | 6   |
| miR-570-3p | <i>TTC14</i>    | 1       | 1       | 1       | 1      | 0     | 1         | 1          | 6   |
| miR-570-3p | <i>CCDC50</i>   | 1       | 1       | 1       | 1      | 0     | 1         | 1          | 6   |
| miR-570-3p | <i>CNTN4</i>    | 1       | 1       | 1       | 1      | 0     | 1         | 1          | 6   |
| miR-570-3p | <i>NFXL1</i>    | 0       | 1       | 1       | 1      | 1     | 1         | 1          | 6   |

Table S1: Continued

| miRNA      | Gene            | miRWalk | Microt4 | miRanda | miRMap | RNA22 | RNAhybrid | Targetscan | SUM |
|------------|-----------------|---------|---------|---------|--------|-------|-----------|------------|-----|
| miR-570-3p | <i>CREBBF</i>   | 1       | 1       | 1       | 1      | 0     | 1         | 1          | 6   |
| miR-570-3p | <i>RNF217</i>   | 1       | 1       | 1       | 1      | 0     | 1         | 1          | 6   |
| miR-570-3p | <i>AMOT</i>     | 1       | 1       | 1       | 1      | 0     | 1         | 1          | 6   |
| miR-570-3p | <i>TMTC3</i>    | 1       | 1       | 1       | 1      | 0     | 1         | 1          | 6   |
| miR-570-3p | <i>GPR180</i>   | 1       | 1       | 1       | 1      | 0     | 1         | 1          | 6   |
| miR-570-3p | <i>ZNF709</i>   | 1       | 1       | 1       | 1      | 0     | 1         | 1          | 6   |
| miR-570-3p | <i>DENND1B</i>  | 1       | 1       | 1       | 1      | 0     | 1         | 1          | 6   |
| miR-570-3p | <i>LONRF2</i>   | 1       | 1       | 1       | 1      | 0     | 1         | 1          | 6   |
| miR-570-3p | <i>PRICKLE2</i> | 1       | 1       | 1       | 1      | 0     | 1         | 1          | 6   |
| miR-570-3p | <i>SGMS2</i>    | 1       | 1       | 1       | 1      | 0     | 1         | 1          | 6   |
| miR-570-3p | <i>TXLNB</i>    | 1       | 1       | 1       | 1      | 0     | 1         | 1          | 6   |
| miR-570-3p | <i>THAP5</i>    | 0       | 1       | 1       | 1      | 1     | 1         | 1          | 6   |
| miR-570-3p | <i>ZNF800</i>   | 1       | 1       | 1       | 1      | 0     | 1         | 1          | 6   |
| miR-570-3p | <i>TMEM64</i>   | 0       | 1       | 1       | 1      | 1     | 1         | 1          | 6   |
| miR-570-3p | <i>OLFML2A</i>  | 1       | 1       | 1       | 1      | 0     | 1         | 1          | 6   |
| miR-570-3p | <i>GLIS3</i>    | 1       | 1       | 1       | 1      | 0     | 1         | 1          | 6   |
| miR-570-3p | <i>VSTM4</i>    | 1       | 1       | 1       | 1      | 0     | 1         | 1          | 6   |
| miR-570-3p | <i>LCTL</i>     | 1       | 1       | 1       | 1      | 0     | 1         | 1          | 6   |
| miR-570-3p | <i>CC2D1B</i>   | 0       | 1       | 1       | 1      | 1     | 1         | 1          | 6   |
| miR-570-3p | <i>TXLNA</i>    | 1       | 1       | 1       | 1      | 0     | 1         | 1          | 6   |
| miR-570-3p | <i>STK32A</i>   | 0       | 1       | 1       | 1      | 1     | 1         | 1          | 6   |
| miR-570-3p | <i>C9orf72</i>  | 1       | 1       | 1       | 1      | 0     | 1         | 1          | 6   |
| miR-570-3p | <i>ANKS6</i>    | 0       | 1       | 1       | 1      | 1     | 1         | 1          | 6   |
| miR-570-3p | <i>ZNF449</i>   | 1       | 1       | 1       | 1      | 0     | 1         | 1          | 6   |
| miR-570-3p | <i>VMA21</i>    | 1       | 1       | 1       | 1      | 0     | 1         | 1          | 6   |
| miR-570-3p | <i>HIPK1</i>    | 0       | 1       | 1       | 1      | 1     | 1         | 1          | 6   |
| miR-570-3p | <i>HIPK1</i>    | 0       | 1       | 1       | 1      | 1     | 1         | 1          | 6   |
| miR-570-3p | <i>C2orf69</i>  | 1       | 1       | 1       | 1      | 0     | 1         | 1          | 6   |
| miR-570-3p | <i>ZNF25</i>    | 1       | 1       | 1       | 1      | 0     | 1         | 1          | 6   |
| miR-570-3p | <i>RTKN2</i>    | 1       | 1       | 1       | 1      | 0     | 1         | 1          | 6   |
| miR-570-3p | <i>DOK6</i>     | 1       | 1       | 1       | 1      | 0     | 1         | 1          | 6   |
| miR-570-3p | <i>HNRNP43</i>  | 1       | 1       | 1       | 1      | 0     | 1         | 1          | 6   |
| miR-570-3p | <i>ARL5B</i>    | 1       | 1       | 1       | 1      | 0     | 1         | 1          | 6   |
| miR-570-3p | <i>HNRNPUL2</i> | 1       | 1       | 1       | 1      | 0     | 1         | 1          | 6   |
| miR-570-3p | <i>RBM24</i>    | 1       | 1       | 1       | 1      | 0     | 1         | 1          | 6   |
| miR-570-3p | <i>SMIM13</i>   | 1       | 1       | 1       | 1      | 0     | 1         | 1          | 6   |
| miR-570-3p | <i>FOXK1</i>    | 1       | 1       | 1       | 1      | 0     | 1         | 1          | 6   |
| miR-570-3p | <i>HS3ST5</i>   | 1       | 1       | 1       | 1      | 0     | 1         | 1          | 6   |
| miR-570-3p | <i>SLC35F1</i>  | 1       | 1       | 1       | 1      | 0     | 1         | 1          | 6   |
| miR-570-3p | <i>ZSCAN23</i>  | 1       | 1       | 1       | 1      | 0     | 1         | 1          | 6   |

Table S1: Continued

| miRNA      | Gene             | miRWalk | Microt4 | miRanda | miRMap | RNA22 | RNAhybrid | Targetscan | SUM |
|------------|------------------|---------|---------|---------|--------|-------|-----------|------------|-----|
| miR-570-3p | <i>ZNRF2</i>     | 1       | 1       | 1       | 1      | 0     | 1         | 1          | 6   |
| miR-570-3p | <i>CNOT6L</i>    | 1       | 1       | 1       | 1      | 0     | 1         | 1          | 6   |
| miR-570-3p | <i>SLC25A30</i>  | 0       | 1       | 1       | 1      | 1     | 1         | 1          | 6   |
| miR-570-3p | <i>LCLAT1</i>    | 1       | 1       | 1       | 1      | 0     | 1         | 1          | 6   |
| miR-570-3p | <i>CADM2</i>     | 1       | 1       | 1       | 1      | 0     | 1         | 1          | 6   |
| miR-570-3p | <i>MMS22L</i>    | 1       | 1       | 1       | 1      | 0     | 1         | 1          | 6   |
| miR-570-3p | <i>CERS6</i>     | 1       | 1       | 1       | 1      | 0     | 1         | 1          | 6   |
| miR-570-3p | <i>UBN2</i>      | 1       | 1       | 1       | 1      | 0     | 1         | 1          | 6   |
| miR-570-3p | <i>MCOLN2</i>    | 1       | 1       | 1       | 1      | 0     | 1         | 1          | 6   |
| miR-570-3p | <i>ELMOD2</i>    | 0       | 1       | 1       | 1      | 1     | 1         | 1          | 6   |
| miR-570-3p | <i>SYT14</i>     | 1       | 1       | 1       | 1      | 0     | 1         | 1          | 6   |
| miR-570-3p | <i>LYSMD2</i>    | 1       | 1       | 1       | 1      | 0     | 1         | 1          | 6   |
| miR-570-3p | <i>MAP7D2</i>    | 0       | 1       | 1       | 1      | 1     | 1         | 1          | 6   |
| miR-570-3p | <i>RNF214</i>    | 1       | 1       | 1       | 1      | 0     | 1         | 1          | 6   |
| miR-570-3p | <i>HSPA12A</i>   | 0       | 1       | 1       | 1      | 1     | 1         | 1          | 6   |
| miR-570-3p | <i>RBM20</i>     | 1       | 1       | 1       | 1      | 0     | 1         | 1          | 6   |
| miR-570-3p | <i>MKX</i>       | 1       | 1       | 1       | 1      | 0     | 1         | 1          | 6   |
| miR-570-3p | <i>PGM2L1</i>    | 1       | 1       | 1       | 1      | 0     | 1         | 1          | 6   |
| miR-570-3p | <i>OLFML1</i>    | 1       | 1       | 1       | 1      | 0     | 1         | 1          | 6   |
| miR-570-3p | <i>RASSF3</i>    | 1       | 1       | 1       | 1      | 0     | 1         | 1          | 6   |
| miR-570-3p | <i>KSR2</i>      | 1       | 1       | 1       | 1      | 0     | 1         | 1          | 6   |
| miR-570-3p | <i>PRTG</i>      | 1       | 1       | 1       | 1      | 0     | 1         | 1          | 6   |
| miR-570-3p | <i>UNC80</i>     | 1       | 1       | 1       | 1      | 0     | 1         | 1          | 6   |
| miR-570-3p | <i>C5orf51</i>   | 0       | 1       | 1       | 1      | 1     | 1         | 1          | 6   |
| miR-570-3p | <i>RGMB</i>      | 1       | 1       | 1       | 1      | 0     | 1         | 1          | 6   |
| miR-570-3p | <i>TRIQQ</i>     | 1       | 1       | 1       | 1      | 0     | 1         | 1          | 6   |
| miR-570-3p | <i>DPY19L4</i>   | 1       | 1       | 1       | 1      | 0     | 1         | 1          | 6   |
| miR-570-3p | <i>SCAI</i>      | 1       | 1       | 1       | 1      | 0     | 1         | 1          | 6   |
| miR-570-3p | <i>EIF4E3</i>    | 0       | 1       | 1       | 1      | 1     | 1         | 1          | 6   |
| miR-570-3p | <i>KRTAP11-1</i> | 1       | 1       | 1       | 1      | 0     | 1         | 1          | 6   |
| miR-570-3p | <i>LUZP2</i>     | 1       | 1       | 1       | 1      | 0     | 1         | 1          | 6   |
| miR-570-3p | <i>ZDHHC21</i>   | 1       | 1       | 1       | 1      | 0     | 1         | 1          | 6   |
| miR-570-3p | <i>KIAA2022</i>  | 1       | 1       | 1       | 1      | 0     | 1         | 1          | 6   |
| miR-570-3p | <i>ZC3H12B</i>   | 1       | 1       | 1       | 1      | 0     | 1         | 1          | 6   |
| miR-570-3p | <i>ZKSCAN2</i>   | 1       | 1       | 1       | 1      | 0     | 1         | 1          | 6   |
| miR-570-3p | <i>OSTN</i>      | 1       | 1       | 1       | 1      | 0     | 1         | 1          | 6   |
| miR-570-3p | <i>PLCXD3</i>    | 1       | 1       | 1       | 1      | 0     | 1         | 1          | 6   |
| miR-570-3p | <i>MACC1</i>     | 1       | 1       | 1       | 1      | 0     | 1         | 1          | 6   |
| miR-570-3p | <i>SKA2</i>      | 1       | 1       | 1       | 1      | 0     | 1         | 1          | 6   |
| miR-570-3p | <i>C1orf95</i>   | 1       | 1       | 1       | 1      | 0     | 1         | 1          | 6   |



Table S1: Continued

| miRNA      | Gene               | miRWalk | Microt4 | miRanda | miRMap | RNA22 | RNAhybrid | Targetscan | SUM |
|------------|--------------------|---------|---------|---------|--------|-------|-----------|------------|-----|
| miR-570-3p | <i>PTAR1</i>       | 1       | 1       | 1       | 1      | 0     | 1         | 1          | 6   |
| miR-570-3p | <i>ERCC6L2</i>     | 1       | 1       | 1       | 1      | 0     | 1         | 1          | 6   |
| miR-570-3p | <i>CEP85L</i>      | 1       | 1       | 1       | 1      | 0     | 1         | 1          | 6   |
| miR-570-3p | <i>FIBIN</i>       | 0       | 1       | 1       | 1      | 1     | 1         | 1          | 6   |
| miR-570-3p | <i>TNFAIP8L3</i>   | 1       | 1       | 1       | 1      | 0     | 1         | 1          | 6   |
| miR-570-3p | <i>PLEKHM3</i>     | 1       | 1       | 1       | 1      | 0     | 1         | 1          | 6   |
| miR-570-3p | <i>VGLL3</i>       | 1       | 1       | 1       | 1      | 0     | 1         | 1          | 6   |
| miR-570-3p | <i>LIN28B</i>      | 1       | 1       | 1       | 1      | 0     | 1         | 1          | 6   |
| miR-570-3p | <i>IYD</i>         | 1       | 1       | 1       | 1      | 0     | 1         | 1          | 6   |
| miR-570-3p | <i>NUDT19</i>      | 1       | 1       | 1       | 1      | 0     | 1         | 1          | 6   |
| miR-570-3p | <i>C20orf202</i>   | 1       | 1       | 1       | 1      | 0     | 1         | 1          | 6   |
| miR-570-3p | <i>CCSER1</i>      | 1       | 1       | 1       | 1      | 0     | 1         | 1          | 6   |
| miR-570-3p | <i>RGS7BP</i>      | 1       | 1       | 1       | 1      | 0     | 1         | 1          | 6   |
| miR-570-3p | <i>SAMD12</i>      | 1       | 1       | 1       | 1      | 0     | 1         | 1          | 6   |
| miR-570-3p | <i>MINOS1</i>      | 1       | 1       | 1       | 1      | 0     | 1         | 1          | 6   |
| miR-570-3p | <i>PALM2-AKAP2</i> | 1       | 1       | 1       | 1      | 0     | 1         | 1          | 6   |
| miR-570-3p | <i>CCDC73</i>      | 1       | 1       | 1       | 1      | 0     | 1         | 1          | 6   |
| miR-570-3p | <i>CLLU1</i>       | 1       | 1       | 1       | 1      | 0     | 1         | 1          | 6   |
| miR-570-3p | <i>ZNF704</i>      | 1       | 1       | 1       | 1      | 0     | 1         | 1          | 6   |
| miR-570-3p | <i>C15orf56</i>    | 0       | 1       | 1       | 1      | 1     | 1         | 1          | 6   |
| miR-570-3p | <i>SYNDIG1L</i>    | 1       | 1       | 1       | 1      | 0     | 1         | 1          | 6   |
| miR-570-3p | <i>FAM198A</i>     | 0       | 1       | 1       | 1      | 1     | 1         | 1          | 6   |
| miR-570-3p | <i>TMEM170B</i>    | 1       | 1       | 1       | 1      | 0     | 1         | 1          | 6   |
| miR-570-3p | <i>C17orf96</i>    | 1       | 1       | 1       | 1      | 0     | 1         | 1          | 6   |
| miR-570-3p | <i>TMEM178B</i>    | 1       | 1       | 1       | 1      | 0     | 1         | 1          | 6   |
| miR-570-3p | <i>ALDH1A3</i>     | 1       | 0       | 1       | 1      | 1     | 1         | 1          | 6   |
| miR-570-3p | <i>FOXN3</i>       | 1       | 0       | 1       | 1      | 1     | 1         | 1          | 6   |
| miR-570-3p | <i>CLU</i>         | 1       | 0       | 1       | 1      | 1     | 1         | 1          | 6   |
| miR-570-3p | <i>ETV1</i>        | 1       | 0       | 1       | 1      | 1     | 1         | 1          | 6   |
| miR-570-3p | <i>FYN</i>         | 1       | 0       | 1       | 1      | 1     | 1         | 1          | 6   |
| miR-570-3p | <i>GFPT1</i>       | 1       | 0       | 1       | 1      | 1     | 1         | 1          | 6   |
| miR-570-3p | <i>GCLC</i>        | 1       | 0       | 1       | 1      | 1     | 1         | 1          | 6   |
| miR-570-3p | <i>GNAI2</i>       | 1       | 0       | 1       | 1      | 1     | 1         | 1          | 6   |
| miR-570-3p | <i>ITPKB</i>       | 1       | 0       | 1       | 1      | 1     | 1         | 1          | 6   |
| miR-570-3p | <i>DNAJB9</i>      | 1       | 0       | 1       | 1      | 1     | 1         | 1          | 6   |
| miR-570-3p | <i>MYCL</i>        | 1       | 0       | 1       | 1      | 1     | 1         | 1          | 6   |
| miR-570-3p | <i>NAPILI1</i>     | 1       | 0       | 1       | 1      | 1     | 1         | 1          | 6   |
| miR-570-3p | <i>NCBP1</i>       | 1       | 0       | 1       | 1      | 1     | 1         | 1          | 6   |
| miR-570-3p | <i>SERPINA1</i>    | 1       | 0       | 1       | 1      | 1     | 1         | 1          | 6   |
| miR-570-3p | <i>PKPI</i>        | 1       | 0       | 1       | 1      | 1     | 1         | 1          | 6   |

Table S1: Continued

| miRNA      | Gene            | miRWalk | Microt4 | miRanda | miRMap | RNA22 | RNAhybrid | Targetscan | SUM |
|------------|-----------------|---------|---------|---------|--------|-------|-----------|------------|-----|
| miR-570-3p | <i>PMAIP1</i>   | 1       | 0       | 1       | 1      | 1     | 1         | 1          | 6   |
| miR-570-3p | <i>PSMD9</i>    | 1       | 0       | 1       | 1      | 1     | 1         | 1          | 6   |
| miR-570-3p | <i>SCN4B</i>    | 1       | 0       | 1       | 1      | 1     | 1         | 1          | 6   |
| miR-570-3p | <i>SCN5A</i>    | 1       | 0       | 1       | 1      | 1     | 1         | 1          | 6   |
| miR-570-3p | <i>SCN5A</i>    | 1       | 0       | 1       | 1      | 1     | 1         | 1          | 6   |
| miR-570-3p | <i>SRL</i>      | 1       | 0       | 1       | 1      | 1     | 1         | 1          | 6   |
| miR-570-3p | <i>CCL8</i>     | 1       | 0       | 1       | 1      | 1     | 1         | 1          | 6   |
| miR-570-3p | <i>CNTN2</i>    | 1       | 0       | 1       | 1      | 1     | 1         | 1          | 6   |
| miR-570-3p | <i>TGFB2</i>    | 1       | 0       | 1       | 1      | 1     | 1         | 1          | 6   |
| miR-570-3p | <i>PRDM2</i>    | 1       | 0       | 1       | 1      | 1     | 1         | 1          | 6   |
| miR-570-3p | <i>PRSS12</i>   | 1       | 0       | 1       | 1      | 1     | 1         | 1          | 6   |
| miR-570-3p | <i>STX16</i>    | 1       | 0       | 1       | 1      | 1     | 1         | 1          | 6   |
| miR-570-3p | <i>ADAM23</i>   | 1       | 0       | 1       | 1      | 1     | 1         | 1          | 6   |
| miR-570-3p | <i>ANGPTL1</i>  | 1       | 0       | 1       | 1      | 1     | 1         | 1          | 6   |
| miR-570-3p | <i>CDC42BPB</i> | 1       | 0       | 1       | 1      | 1     | 1         | 1          | 6   |
| miR-570-3p | <i>HS2ST1</i>   | 1       | 0       | 1       | 1      | 1     | 1         | 1          | 6   |
| miR-570-3p | <i>SLC25A44</i> | 1       | 0       | 1       | 1      | 1     | 1         | 1          | 6   |
| miR-570-3p | <i>AREL1</i>    | 1       | 0       | 1       | 1      | 1     | 1         | 1          | 6   |
| miR-570-3p | <i>ZBTB5</i>    | 1       | 0       | 1       | 1      | 1     | 1         | 1          | 6   |
| miR-570-3p | <i>LPGAT1</i>   | 1       | 0       | 1       | 1      | 1     | 1         | 1          | 6   |
| miR-570-3p | <i>STON1</i>    | 1       | 0       | 1       | 1      | 1     | 1         | 1          | 6   |
| miR-570-3p | <i>CPSF6</i>    | 1       | 0       | 1       | 1      | 1     | 1         | 1          | 6   |
| miR-570-3p | <i>PDZD2</i>    | 1       | 0       | 1       | 1      | 1     | 1         | 1          | 6   |
| miR-570-3p | <i>TBC1D30</i>  | 1       | 0       | 1       | 1      | 1     | 1         | 1          | 6   |
| miR-570-3p | <i>PPP1R13B</i> | 1       | 0       | 1       | 1      | 1     | 1         | 1          | 6   |
| miR-570-3p | <i>RASD2</i>    | 1       | 0       | 1       | 1      | 1     | 1         | 1          | 6   |
| miR-570-3p | <i>NGFRAP1</i>  | 1       | 0       | 1       | 1      | 1     | 1         | 1          | 6   |
| miR-570-3p | <i>RABGEF1</i>  | 1       | 0       | 1       | 1      | 1     | 1         | 1          | 6   |
| miR-570-3p | <i>GOLT1B</i>   | 1       | 0       | 1       | 1      | 1     | 1         | 1          | 6   |
| miR-570-3p | <i>TBC1D8B</i>  | 1       | 0       | 1       | 1      | 1     | 1         | 1          | 6   |
| miR-570-3p | <i>SLC39A9</i>  | 1       | 0       | 1       | 1      | 1     | 1         | 1          | 6   |
| miR-570-3p | <i>CNOT11</i>   | 1       | 0       | 1       | 1      | 1     | 1         | 1          | 6   |
| miR-570-3p | <i>SMPD4</i>    | 1       | 0       | 1       | 1      | 1     | 1         | 1          | 6   |
| miR-570-3p | <i>KANSL3</i>   | 1       | 0       | 1       | 1      | 1     | 1         | 1          | 6   |

Table S1: Continued

| miRNA      | Gene            | miRWalk | Microt4 | miRanda | miRMap | RNA22 | RNAhybrid | Targetscan | SUM |
|------------|-----------------|---------|---------|---------|--------|-------|-----------|------------|-----|
| miR-570-3p | <i>DNAJC11</i>  | 1       | 0       | 1       | 1      | 1     | 1         | 1          | 6   |
| miR-570-3p | <i>IL36G</i>    | 1       | 0       | 1       | 1      | 1     | 1         | 1          | 6   |
| miR-570-3p | <i>GPR108</i>   | 1       | 0       | 1       | 1      | 1     | 1         | 1          | 6   |
| miR-570-3p | <i>SLC12A9</i>  | 1       | 0       | 1       | 1      | 1     | 1         | 1          | 6   |
| miR-570-3p | <i>KIAA1210</i> | 1       | 0       | 1       | 1      | 1     | 1         | 1          | 6   |
| miR-570-3p | <i>NSD1</i>     | 1       | 0       | 1       | 1      | 1     | 1         | 1          | 6   |
| miR-570-3p | <i>ZNF614</i>   | 1       | 0       | 1       | 1      | 1     | 1         | 1          | 6   |
| miR-570-3p | <i>ORAI2</i>    | 1       | 0       | 1       | 1      | 1     | 1         | 1          | 6   |
| miR-570-3p | <i>LDOC1L</i>   | 1       | 0       | 1       | 1      | 1     | 1         | 1          | 6   |
| miR-570-3p | <i>C2orf88</i>  | 1       | 0       | 1       | 1      | 1     | 1         | 1          | 6   |
| miR-570-3p | <i>SRRM4</i>    | 1       | 0       | 1       | 1      | 1     | 1         | 1          | 6   |
| miR-570-3p | <i>FOXP2</i>    | 1       | 0       | 1       | 1      | 1     | 1         | 1          | 6   |
| miR-570-3p | <i>PNMA5</i>    | 1       | 0       | 1       | 1      | 1     | 1         | 1          | 6   |
| miR-570-3p | <i>ASB7</i>     | 1       | 0       | 1       | 1      | 1     | 1         | 1          | 6   |
| miR-570-3p | <i>SLFN13</i>   | 1       | 0       | 1       | 1      | 1     | 1         | 1          | 6   |
| miR-570-3p | <i>SPRED2</i>   | 1       | 0       | 1       | 1      | 1     | 1         | 1          | 6   |
| miR-570-3p | <i>SDK1</i>     | 1       | 0       | 1       | 1      | 1     | 1         | 1          | 6   |
| miR-570-3p | <i>KCTD20</i>   | 1       | 0       | 1       | 1      | 1     | 1         | 1          | 6   |
| miR-570-3p | <i>CT45A3</i>   | 1       | 0       | 1       | 1      | 1     | 1         | 1          | 6   |
| miR-570-3p | <i>CT45A4</i>   | 1       | 0       | 1       | 1      | 1     | 1         | 1          | 6   |
| miR-570-3p | <i>CT45A2</i>   | 1       | 0       | 1       | 1      | 1     | 1         | 1          | 6   |
